# Supplementary material
Source: Research Square preprint supplement (doi:10.21203/rs.3.rs-9417637/v1)
Supplement: Supplementary file 2 [file 72d242e7d7b622dc59740658.docx]

**Table 1: Group Model Building Participants**

| **Variable** | **Response** | **Total (*n* = 14)** |
| --- | --- | --- |
|  |
| **Gender** | Female | 12 (85.7%) |  |
| Male | 2 (14.3%) |  |
| **Race** | Asian | 1 (7.1%) |  |
| Black | 2 (14.3%) |  |
| White | 9 (64.3%) |  |
| Missing | 2 (14.3%) |  |
| **Age** | Mean (SD): 41 years (6.7) | 11 (78.6%)* |  |
| **Hispanic** | Yes | 0 (0.0%) |  |
| No | 11 (78.6%) |  |
| Missing | 3 (21.4%) |  |
| **Role Category** | Certification of Peer Support Specialists | 1 (7.1%) |  |
| Crisis care | 4 (28.6%) |  |
| Policy | 7 (50.0%) |  |
| Training of Peer Support Specialists | 2 (14.3%) |  |
| **Employer Category** | Academic-Government Partnership | 3 (21.4%) |  |
| Educational Institution | 2 (14.3%) |  |
| Government | 4 (28.6%) |  |
| Non-profit | 1 (7.1%) |  |
| Organization providing crisis services | 4 (28.6%) |  |
| **Ever Provided Behavioral Health Services** | Yes | 12 (85.7%) |  |
| No | 0 (0.0%) |  |
| Missing | 2 (14.3%) |  |
| **CRSS/CPRS Certified** | Yes | 3 (21.4%) |  |
| No | 9 (64.3%) |  |
| Missing | 2 (14.3%) |  |
| **Provided/Directed Mobile Crisis** | Yes | 7 (50.0%) |  |
| No | 5 (35.7%) |  |
| Missing | 2 (14.3%) |  |

* This indicates the number of responders to this variable (i.e. age data was collected for 11 of 14 participants, whereas it was missing for 3 participants)

**Table 2: Number of Responses for Each Real-time Survey Question Asked to Mobile Crisis Program Directors**

| **#** | **Question** | **Number of Responses** |
| --- | --- | --- |
| 1 | What factors do you think impact the rate at which Crisis Counselors enter the mobile crisis workforce? | 53 |
| 2 | What do you think would help increase the rate at which Crisis Counselors enter the mobile crisis workforce? | 50 |
| 3 | What factors do you think impact the rate at which Crisis Counselors leave the mobile crisis workforce? | 53 |
| 4 | What do you think would help decrease the rate at which Crisis Counselors leave the mobile crisis workforce? | 43 |
| 5 | What factors do you think impact the rate at which Engagement Specialists enter the mobile crisis workforce? | 45 |
| 6 | What do you think would help increase the rate at which Engagement Specialists enter the mobile crisis workforce? | 30 |
| 7 | What factors do you think impact the rate at which Engagement Specialists leave the mobile crisis workforce? | 37 |
| 8 | What do you think would help decrease the rate at which Engagement Specialists leave the mobile crisis workforce? | 24 |
