# Supplementary material
Source: Research Square preprint supplement (doi:10.21203/rs.3.rs-9417637/v1)
Supplement: Supplementary file 3 [file 9d2a390fd88753360efe32c2.docx]

| **Inflow/Outflow Factor** | **Solution** |
| --- | --- |
| Individual Readiness and Motivation | |
| - **Engagement Specialist (ES) Stage of recovery and re-traumatization during**; *“Finding an Engagement Specialist who is at a point in their recovery to be able to assist others without revisiting their past traumas”, “Not being in a place in their own journey to help others. Old trauma wounds reopen and they are unable to continue with the work”* - **Lack of boundaries/professionalism**; *“Lack of people far enough along in their own recovery to be able to understand the boundaries/rules in place for transitioning to a professional role”* - **Lived experience/passion for crisis work**; “*Previous positive (or negative) experiences with crisis services”* - **Previous experience working in crisis** | - More opportunities for ESs to engage in and strengthen their own recovery during the workday - Add required training for ESs focused on self-care - Offer opportunities for professional development - Seek former clients to work as ESs - Empower staff to use their personal story as motivation in their work |
| Pay and Funding | |
| - **Pay/salary**; *“Better pay! Some crisis counselors make only slightly above minimum wage...”* - **Benefits/incentives** - **Inability to bill/low reimbursement rates** - **Pay ladder issues and pay inequities**; *“Many agencies don’t pay for licensed level staff because no rate change in revenue”* - **Discrepancy in allowable services under Medicaid and the Program 590 grant (single vs team response)** - **Non-reimbursed vehicle expenses**; *“Expenses - such as gas and wear on car, are not truly captured by mileage reimbursement or pay”* - **Instability and insufficiency of grant funding**; *“Uncertainty about the permanency of state funded programs”* | - Increase pay - Increase benefits and incentives (e.g. PTO, MH days, hiring bonus, tuition reimbursement, on-call stipend) - Ensure consistent Medicaid billing and procedures across mental health and substance use crises - Organizations may pay for individuals with advanced credentials (e.g. clinicians with master’s degrees or licensure) to remain working in the field - Changing Medicaid rules to create new criteria that acts as the higher rung on the pay ladder between RSAs and CRSSs, while removing the ability of CRSSs to bill as MHPs - Alternative payment models - Equal pay for CCs and ESs - Obtain alternative funding (e.g. outside grants) - Use funding to supplement need for more necessary equipment/resources (vehicles, staff) |
| Credentialing and Required Competencies | |
| - **Minimal entry requirements**; *“Ability to work in the field without bachelor’s degree”* - **Required CPRS/CRSS completion for ESs**; *“The mandate of completing the CRSS certification within one year of employment”* - **Background checks**; *“Difficulty being able to be cleared through the required background checks. Based on events which may have occurred in their past.”* - **Challenging and time consuming to sufficiently prepare individuals for the role**; *“…in the summer it is hard to onboard someone, because the referrals are fewer. It's also really hard to onboard someone in our busiest month of October because it's pretty overwhelming.”* - **Poor job performance/inadequate preparedness for role**; *“Sometimes, staff, be it Crisis Counselors or Engagement specialists, are terminated due to poor work performance; they are not just leaving, per se”* | - Simplify and streamline routes to MHP and ES (e.g. expand alternate pathways for those without college degrees, approve CRSS/CPRS training equivalents) - Expand entry pathways for SUD professionals - Develop or expand formal CRSS training pathways in colleges - Decreasing need for direct crisis work experience upon entry into the position - Waive exam/credentialing fees for those pursuing CRSSs along "Independent" pathway - Waive or simplify background checks - Introduce faster clearance processes - Promote transparency and clarity in background checks - Add additional required training for ESs or CCs to improve work performance |
| Role Clarity | |
| - **Role confusion**; *“MHPs serve a lot of different functions across the system”,* “*Role confusion / crisis counselors don't understand Eng Spec role”* - **Expectations for the role not aligned with reality of the role**; *“Many want to help but are unaware of how taxing the job can be.”* | - Clarify job definition, job path, and responsibilities (e.g. Medicare billing standards, job postings) - Interview for risk tolerance, level of recovery, and/or ensuring good fit |
| Social Determinants of Employment | |
| - **Housing stability or lack of transportation**; *“Having a stable place to stay”* - **Worsened health**; *“Health concerns, high stress, high demand, irregular sleep”* - **Access to local educational opportunities**; *“Number of education institutions local to the community.”* | - Offer opportunities for employment without requirement of owning a car |
| Career Progression | |
| - **Desire to gain work experience** **in the field**; *“Often crisis is seen as a stepping stone… [to] higher paying or what they see as more prestigious roles”* - **Professional development and skill-building**;*“Not a lot of room for professional development within the crisis services spectrum of services”;* “If you can handle a crisis [you are] more valuable to an employer.” - **Other roles more appealing/current role is limited**; “*Find higher pay, better schedule in other roles”* - **High demand/growing field**;“Expanding crisis services - more open roles” | - Improve pathways for promotion and long-term careers - Rotate roles to promote experience (e.g. between crisis teams, crisis stabilization unit) or expand responsibilities of current role |
| Negative Aspects Inherent to the Nature of Mobile Crisis Work | |
| - **High stress/intensity**; *“Difficulties handling the stress of the position at different times”* - **Secondary trauma**;*“The stress level and emotional toll the job takes on you from vicarious trauma”* - **Burnout or emotional exhaustion/compassion fatigue**;*“Burnout, taking it really hard when clients relapse or have setbacks”* - **Verbal abuse from clients** - **Unpredictability/unknown schedule**; “*Needing more predictable schedule at and off work*” - **Safety concerns**; “*Discomfort being alone in the community responding to difficult situations. Especially in rural areas where emergency support can be at a minimum 20 minutes away*.” | - Identifying and preventing burnout - Co-response with an officer to increase responder safety - Increase safety protections and ensure robust safety and medical attention policies - Unionization of workers to prevent individual response to crises |
| Positive Aspects Inherent to the Nature of Mobile Crisis Work | |
| - **Work that engages and protects the community**; “I think people may feel interested in working in crisis work or being in the community…” - **Unique work setting, with the potential to work with a specific population**;*“Not ‘stuck’ at desk”* - **Immediate outcomes/short-term engagement** - **Work is impactful**; *“Motivation to do amazing, exciting work that saves lives”* - **Work is exciting and every day is different**; *“passion for crisis work... every day is different”* |  |
| Workload and Scheduling | |
| - **Schedule flexibility**; *“…9-5 an issue? No problem - we are 24/7!”* - **On call work**; *“Lack of flexibility with on call... demanding schedule”* - **Undesirable hours**; *“Requirement of weekend, overnight, and holiday hours”* - **Challenging to maintain work-life balance**; *“Poor work life balance. Not always being able to leave on time. Not always a set 40 hour a week schedule”* - **Administrative burdens**; *“The demand of the nature of the calls, then having to come back to complete the documentation”* - **Overscheduling/understaffing/excessive workload**; *“Overscheduled to cover for lack of staffing”* - **Need to travel long distances** | - Creative scheduling practices that increase flexibility, such as, rotating weekend/overnight/holiday coverage, on call stipends, and splitting shifts - Utilize “committed shift”-style scheduling model - Foster culture that values work-life balance - Cut paperwork and remove bureaucracy - Increase staffing to split the workload - Offer remote or flexible options - Shrink coverage areas - Allocate extra work when staff are being underutilized |
| Work Environment and Culture | |
| - **Collaborative work environment**; *“The collaborative nature of the work-EDs, PD, community resources, etc.”* - **Absence of others with lived experience**;*“…issues with feeling they don't fit in with other staff who do not have lived experience as they do”* - **Supervision and leadership support**; *“Lack of support from supervisors”* - **Insufficient mental health and emotional support at work**;*“Insufficient emotional support from organization”* - **Misunderstanding and judgement of role by coworkers towards ESs**; *“Made to feel less than by their peers”* | - Ensure managers know how to lead and support staff through training/lived experience - Leadership can show staff they are valued, boost morale, and reduce stigma - Increase supervisor oversight, meetings, and collaboration - Offer training, professional development, and skill building opportunities (new languages, skills to work with people with SUD, etc.) - Offer mental health support services for all employees, including counseling, EAP, mental health days, more debriefs, connectedness to peer groups - Offer retreats/team building - Training for clinical staff on working with individuals with lived experience - Increase workplace/responder team recognition of the importance of mobile crisis workers |
| External Context | |
| - **National standards and professional organizations** - **Present but decreasing stigma in society against those with mental illness impacting ESs**; “*Decreased mental health stigma.”* - **General lack of awareness of mobile crisis roles**;“*Not knowing the position exists yet. Since it is newer”* - **Poor job market for recent college graduates**; *“Minimal well-paying job opportunities being available to new grads”* - **Increasing acuity of clients**; *“Acuity is increasing leading to needing to know a lot about every diagnosis, symptom and type of client”* - **Underappreciation for the key role played by mobile crisis workers in society toward ESs and CCs**; *“Identification and recognition as an emergency responder”* - **System fragmentation**; *“Lack of resources for clients. The feeling of knowing that you did everything you could for the client but also knowing that there is a gap in the system that doesn't meet clients’ needs fully”* | - Society should value and respect lived experience - Increase advertising and marketing of mobile crisis positions - Increases in societal recognition of the importance of mobile crisis workers, especially as first responders - Increase external partnerships with DCFS, police, and other community partners - Increases community mental health services (e.g. a living room, inpatient beds, outpatient therapy, case management) and community services (e.g. access to housing, employment, food) in communities |
