# Supplementary material
Source: Research Square preprint supplement (doi:10.21203/rs.3.rs-9417637/v1)
Supplement: Supplementary file 4 [file b7f8fab3c6e6d48d654eef31.xlsx]

## Sheet: Original Mentimeeter Data
Question 1
Question	What factors do you think impact the rate at which Crisis Counselors enter the mobile crisis workforce?
Respondents	53
Responses
Shopping for greater salary
Multiple other openings that do not require on call or going into the community
Pay and incentives
Pay, lack of support from community partners.
Good position for people looking to get experience in the mental health field after completing undergrad (doesn't require masters).
The appeal of working in a crisis capacity., it sounds exciting.
PAY that reflects training and expertise, , outreach to colleges that crisis work in an option
Difficulty working with EMS and Police
pay and the unpredictability of the work
Short term relationships with clients. Being able to see immediate outcomes
motivation to do amazing , exciting work that saves lives.
Having worked Crisis before and deciding it's not for them. Not wanting to work after-hours / weekends
Pay potential is high for that educational level of staff
School & experience requirements
the unknown
passion for the crisis work that they do and motivated to be in a vulnerable space with clients, , everyday is different
Not knowing the position exists yet. Since it is newer.
Pay, hours of work, benefits, desire to work in crisis
Money, being on call, stress of the job
Once they receive their higher license they move on to IT.
work they are completing, pay rate, culture, support, supervision, team collaberation
Excitement of helping others;
A huge factor that we have run into is state policy dictating specific hard stops to employment at mental health agencies. For instance someone having something come back on their DCFS background chec
Hours of work; stress of unpredictability
short-staffing leads to them being overworked and then some staff leave due to that
higher pay
higher salary and better ability to staff without working multiple weekends/month on call
lived experience
Unique experience
Pay scale
Desire to work in Crisis (or not)
Pay and unpredictability, Lived experience , Immediate outcomes , Longer hours
Hours of work (24/7 nature of crisis)
Not a lot of people want to be on-call overnight and on weekends. Pay does not off-set the inconvenience. On call stipend is not high enough to be worth it if they do not get called out.
Low barrier to entry
pay and incentives, exciting work, chance to gain experience, passion for the work, being trusted to help people on their hardest days, going in the community,
Gaining experience for additional career opportunities.
Fear of responding in the community.
Higher salary
Personal and professional Values (actively working towards the benefit of their community as a whole)
salary
Pay rate
Community safety
Higher salary
salary, work life balance, requirement of weekend, overnight, and holiday hours
Salary
salary and work environment
community safety
getting experience within the mental health system
Ability to pass background checks
Gaining experience in mental health
Personal interes in the area of crisis intervention
Previous positive (or negative) experiences with crisis services
Community safety--people feel or do not feel safely executing the work in areas where there is high incidents of crime
Higher Salaries and a more structured road of trainings
Frustration with the mental health system. Providing short term intervention only and not being able to see client outcomes
Experience, readiness and teachability
Compensation
Working in a government entity with great benefits.
Wanting to give back to the community and previous experience with themselves or families with the system.
Requirements for lived experience
Low rate of pay .
Less stigma regarding their mental illness.
Opportunity to help people when they really need it. Make a difference.
They are newly graduated and looking for a job that offers them a wide range of experience. They are looking for the flexible schedule our crisis program offers them.
Supporting their communities.
Pay, personal lived experiences, member of the community, schedule flexibility,
I think people may feel interested in working in crisis work or being in the community., , great experience
Lots of discussion nationwide on crisis response. Recent grads are aware of this
Minimal well paying job opportunities being available to new grads.
Number of education institutions local to the community. Intern to employee pipeline
Pay and incentives, some people don't want to go into peoples homes and dangerous communities, other openings
Specialization of the field
not having to be on call or available 24/7
Higher pay, more staff available
higher compensation, , more ways to enter into the role (some people don't have the degree), , Sometimes people get tired of the 24/7 and not having remote opportunities.
Question 2
Question	What do you think would help increase the rate at which Crisis Counselors enter the mobile crisis workforce?
Respondents	50
Responses
$$$$$
Higher salary and more support from other agencies, such as DCFS
Free counseling support for the crisis counselor
Better pay! Some crisis counselors make only slightly above minimum wage with a 4-year degree.
More experience, better education regarding crisis, pay!!
Money
Increase pay
higher salary
Reasonable shifts and expectations, increased pay
Flexible hours, more staff available, to split up the shifts
Money. respect.
more ways to enter the position. If they don't have a 4 year degree, how else can they gain the experience needed to qualify for the roles?
pay
Increased pay
Pay
More stable hours & hand-off systems
Better work life balance
pay
More action
support increase
Increase pay, more support
fully staffed teams
Increase in pay
For our agency, individuals on primary or secondary on-call, they get to work from home.
on-call and having to work lots of shifts
Burnout and general job stress.
increased salary
Increased pay and/or other incentives or flexibilities
increase pay, development support, hours,
Increase pay.
raising the on-call stipend would help. breaking the weekend shifts into day time/ night time could also help. All things we have talked to administration about.
increased pay,
A well-established relationship with police to support comfort levels and increased budgets to employ a larger team so that 24/7 staffing is not so intrusive.
Identification and recognition as an emergency responder
yes, a living room would help so much in our area.
Better work/life balance.
More money
Better understanding of the work
Being able to reduce their student debts thorugh this line of work
Increase pay and solid benefits
Pay and hours worked (effective scheduling )
money, room for growth and transformational leadership
Higher salary, more upward mobility in the organization, more equitable sharing of the burden of overnight and weekend coverage
The possibility of having room for growth, learning other languages
pay and better resources for client's.
lack of flexibility with on call scheduling/demanding work schedule
Right now specifically uncertainty about the permanency of state funded programs
The role and duties did not align with their career goals/path, after all
Challenges with peers
being valued by leadership, i.e., self -care days, incentives, saying we appreciate the work you do,.
Higher salaries
Stability. Benefit package.
Better pay
Pay. More financial support for education and training to help further ones career.
The opportunity for advancement/professional development
Burn out and no enough money
When people have to be on call or available 24/7
Better communication of the clinical supervision and skills development that happens.
Providing flexibility, providing quality supervision
Increased pay and/or other incentives or flexibilities
Increase pay, more support
Pay, schedule, and have more experience and know they like crisis work due to past experience(s)
If you can handle a crisis and can put that on your resume- you’re much more valuable to an employer.
Reasonable shifts and expectations, increased pay
Due to grant funding, the crisis counselor roles pay more than other roles at our agency. This makes these roles more attractive than other roles requiring the same experience/education
Poor training
hours and schedule, , safety issues, , compensation
Question 3
Question	What factors do you think impact the rate at which Crisis Counselors leave the mobile crisis workforce?
Respondents	53
Responses
burn out and feeling under appreciated
Agreed, burn out
being overworked and not compensated, compassion fatigue, lack of systemic change, lack of resources in community serving
administrative oversight
Having to bounce back and forth between 1st, 2nd, and 3rd shifts.
Lack of pay, which creates external stressors limiting their ability to sustain work-related stress.
Hours and On Call duties
The demand of the nature of the calls, then having to come back to complete the documentation.
Discomfort being alone in the community responding to difficult situations. Especially in rural areas where emergency support can be at a minimum 20 minutes away.
stress
long hours
Hours of shifts and stress
unpredictability of the work day
pay, many agencies dont pay for licensed level staff bc no rate change in revenue. burn out, on call shifts.
Stress. Some may work another job already, and decide they don't need a "side job" with so much stress for not enough pay
Burnout.
Long hours
On-call hours in addition to shift work
Poor work life balance. Not always being able to leave on time. Not always a set 40 hour a week schedule
working multiple hours over designed shifts; travel distance/time; acuity is increasing leading to needing to know a lot about every diagnosis, symptom and type of client
Large geographical range
overworked; underpaid; unpredictable schedule
Stress, hours, pay, feeling connected to the team
Rate of pay, lack of upward mobility in position, stress from work
the stress level and emotional toll the job takes on you from vicarious trauma
always moving organizational changes
Burnout, stress, and pay
burnout; other positions with higher salary
Compassion Fatigue, burn out
health concerns, high stress, high demand, irregular sleep
Find higher pay, better schedule in other roles
move out of on-call positions
move on to higher paid positions
burnout, compassion fatigue, opportunity for more pay elsewhere,
Burnout, feeling overworked, moving onto other positions with higher pay
get less demanding jobs that have similar pay
Often crisis is seen as a stepping stone. They move on to higher paying or what they see as more prestigious roles.
Needing more predictable schedule at and off work.
crisis workers get advanced degrees and move into clinical roles
24/7 schedule, working holidays, call offs and unexpected coverage is frequent.
Waiver process for background checks
demanding hours
Rigid workplace policies
lack of resources for clients. , The feeling of knowing that you did everything you could for the client but also knowing that there is a gap in the system that doesn't meet clients needs fully
burnout. find higher pay. better schedule in other roles
Not having a lot of room for professional development within the crisis services spectrum of services
They are consistently working with people on one of the worst days of their lives, and without higher pay some can't engage in self care needed to maintain resilience.
Lack of financial support for crisis workers
Demanding hours. , something less stressful with more pay
Ability to earn more money doing less stressful work
overnight and weekend hours, salary and benefits, compassion fatigue, concern for personal safety, ever-changing policies and directives from leadership and funders
Gain the experience of being a part of the mobile crisis team as a Crisis Counselor and move on to administrative/supervisory positions.
Money
Positive perspective of professional experience, the possibility of having continuous supervision and support in their professional route, increased wages
Financial Stress and cliental
Pay. Stressful situations.
Difficulty amongst peers
Experience with burnout, and compensation.
Unable to balance work life vs home life
Poor work life balance. Not always being able to leave on time. Not always a set 40 hour a week schedule
Constant change in programming
Pay and not feeling compensated fairly
Compensation
Being on call for a long period of time, changes in family/life
Too many shifts without enough down time. Insufficient emotional support from organization
Lack of growth opportunities, lack of pay raises, hours of shift, wanting more predictability in their day
Getting clinical licensure and being able to go make more
Long hours, low morale, lack of support from management, lack of sufficient training
The work is heavy and they are often newer clinicians and struggle with time management and self care, also looking for more of where their professional goals align
lack of career growth opportunities
Vicarious trauma
Question 4
Question	What do you think would help decrease the rate at which Crisis Counselors leave the mobile crisis workforce?
Respondents	43
Responses
Free counseling/group support, increase access to resources, more money
Increase allowed PTO, more equitable pay, increased mindfulness around burnout/warning signs of burnout
breaking the stigma with MCR needing support, so many are afraid to say they are struggling because they are the ones called to help others who struggle so they feel they cannot show their needs.
increase PTO, increase pay, better EAP support. mh days!
Money and increase support
increased pay. having more staff so that the staff who are working can divide the work up more equitably
Having time for more meetings for consultation / support / brainstorming / feeling a part of the team.
Increase support for after hour shifts. , Increased pay.
Pay, acknowledgement
Ability to sustain larger stagging plans to reduce on call hours
Smaller region coverage
Improved consistency in workload or the ability to utilize a larger team for support
higher pay; increased support through staff, equipment (ex: vehicles),
More bed availability for placements
Decreased administrative burdens through redundant documentation
Better bed availability for inpatient and for State Operated Facilities
Doing a better job interviewing for high risk tolerance
More support, better debriefing, more PTO offered for time off
boosting morale within mental health; higher pay; full workforces
Higher pay, more supports, better understanding of position requirements
More training or options for self-care through the organization
Higher pay, and more resources for the homeless.
stronger training on self-care, vicarious trauma - how to truly implement the knowledge and skills
Reducing agency wait lists for therapy and case management would help to reduce reliance on crisis services.
Continuity or better systems for inpatient placement. Staff get seriously annoyed with repetitive bed search processes.
Higher pay, better relationships with community partners
More available staff, more partnerships with available resources, higher pay.
more resources available in the community -- shelters, food, jobs
increased pay-
ability to engage in meaningful work
Feeling empowered to utilize their life story and experiences to help others.
100% remote work
The ability to take time off more frequently
increased salary, more paid time off, rotating schedules for those burdened with overnight and weekend work, equitable share of holiday work, telehealth expansion
better resources for clients. , increase in pay , better support systems
Having the possibility of having a proper possibility of professionale development within the agency they work at
Areas for growth within the work or rotations between like a fast pace crisis team (crisis stabilization) and a less fast pace crisis team (MCRT)
remote/on call
level of recovery and ability to manage the job. Many want to help but are unaware of how taxing the job can be.
Difficulties in task, time management and working in teams
Remote opportunities
Opportunity for growth. Pay. Self-Care.
Better interactions with law enforcement and EMS/Fire, community support and employer support.
Pay increase, team building workshop/ retreat.
We need to be more flexible with their personal concerns.
Stronger supervision
Increased pay and benefits
Encouraging a work/life balance, pay increase
Higher pay, More structure
Reducing work related stress
Since crisis services are relatively new- even supervisors frequently are newbies themselves.
Increase in pay and structured time of schedules and reducing admin burdens
More growth opportunities, increased supervision, further understanding of position requirements
Unknown of future and grant
Increase compensation, more training relevant to job, support of supervisor, identifying burnout before it happens
Creating a culture where managing burnout and vicarious trauma is supported and modeled.
Question 5
Question	What factors do you think impact the rate at which Engagement Specialists enter the mobile crisis workforce?
Respondents	45
Responses
During the interview process our agency has found it more difficult to find candidates far enough in their own recovery to be able to manage the high stress of Crisis response without burn out
Lack of clarity on the job description
- Agency standards on status of certification (CRSS), - Their own recovery status
peer recruitment
Recovery, Support, Benefits
the position isnt what they thought
Similar to the first response - lack of people far enough along in their own recovery to be able to understand the boundaries/rules in place for transitioning to a professional role.
peer recruitment
Difficulty being able to be cleared through the required background checks. Based on events which may have occurred in their past.
Level of recovery, lack of professionalism, lack of ethics and boundaries. Could be due to lack of training. Lack of billable services for the agency. Increased cost to agency.
Pay is a factor as well. Agencies try to underpay peers based on their lack of higher education which creates unlivable wages.
Difficulty with background check process (past felonies or being on the healthcare registry ineligible to work)
Pay rate. Opportunity for growth.
The nature of the peer roles does not fit their career trajectory or preference.
Background checks, opportunities for growth, pay.
Finding a balance between helping others and maintaining their recovery capital
Also finding an Engagement Specialist who is at a point in their recovery to be able to assist others without revisiting their past traumas.
Persons do not have a clear idea of the position, until the interview. Then with the proper information they determine it's not for them.
Background check processes have placed barriers to hiring
Difficulties handling the stress of the position at different times.
Wanting to help others achieve recovery
Decreased mental health stigma
Ability to work in the field without Bachelors Degree
not what they thought the position was
Distress tolerance and education vs pay
Desire to meet the mission and be impactful in helping others from a peer perspective for those in vulnerable moment.
Ability to hire former clients who have gained recovery
Pay
More outreach so they understand and are aware of jobs that are available to them.
Knowledge of the position
Desire to help others with similar experiences
their current struggles with mental health at times keep them from applying, as well as their lack of knowledge about the roles
shared experience
Opportunity to give back, instill hope. Be the hope they needed for someone else.
Ability to be hired without having any experience and getting to share their story to help others in recovery
pay, recognition as professionals, hesitation because of background checks,
Interest in using their lived experience to help others.
can see the positive impact their work makes
They are an important part of the team
recognition and respect and support
More clarity around background check, DCFS check, and criminal history.
lived experience
Knowing engagement specialist positions even exist
Knowledge of the services
limited support, stage of recovery (how long in sustained recovery), and criminal background checks can be barriers
Wanting to help others who have had similar life experiences
pay and lack of emotional support
Leave the Workforce: The difference in pay between a Peer Support Specialist and an Engagement Specialist.
Sometimes, staff, be it Crisis Counselors or Engagement specialists, are terminated due to poor work performance; they are not just leaving, per se.
Lack of educational experience or lived experience
Desire to help others who are experiencing what they have experienced.
Their readiness. Lack of professional experience or experience being in a professional setting, setting proper boundaries. Limitations of the role.
Wanting to gain experience so they can pursue different roles in the field.
Support from supervisor
Having a stable place to stay. Life balance
Lived experience requirement.
Question 6
Question	What do you think would help increase the rate at which Engagement Specialists enter the mobile crisis workforce?
Respondents	30
Responses
Realistic salary and benefits
Increased advertising around the goal of the peer support model and its efficacy thus far
Co-response with an officer to increase feeling of safety.
Providing more opportunities for peers to engage and strengthen their own recovery during the workday so that they can better support others.
Waiver process for DCFS background checks.
more knowledge ahead of time of what the position is and how they can help others in their journeys
Pay, respect for lived experience within the general public and professional world.
higher pay
Training our management staff on how to effectively lead staff who are in these roles.
A way to work through the background check process that shortens the time from job offer to job start. We've seen people find other jobs while waiting for backgrounds.
Increased funding to improve pay / benefits
More assistance or education pertaining to the background check waiver process.
Being able to do more in their position
More awareness that this career track exists
More clear distinction on job roles in comparison to crisis workers
More global understanding of what peer support actually means and how it is discussed at all levels
1) improvement in pay, 2) clarity of job role and aligning the strengths they have with client needs
Increased support for the vicarious trauma that they experience that may trigger them
More support when dealing with trauma (their own and others), rate of pay, clear understanding of role
stronger , advertisement and recruitment efforts
training of supervisors and staff working with engagement specialists. Encouraging engagement specialists to have their own peer support within the agency.
Background check waiver.
More awareness that this type of job is available. Many people still do not know that peer recovery is a profession.
increased pay, recognizing the importance of what they have to offer
destigmatize their lived experience
Maybe more structure to the role when not responding to crises/making follow up calls/ looking up resources.
Simple way to waive background checks, particularly DCFS. we have had problems even with closed cases
background waivers, Comparable salary to Crisis Counselors
Continued development of the CRSS programs at local colleges, ensuring adequate support for those in programs
Insufficient guidance to teach ethics, foundational clinical skills, and support for continued recovery.
Pay
Knowing that they are able to assist those in need (validation).
Advancements in the field may take a long time which can be discouraging.
Revise requirements fro the position
Waving background check and more competitive pay.
creating a better pipeline for advancements
Question 7
Question	What factors do you think impact the rate at which Engagement Specialists leave the mobile crisis workforce?
Respondents	37
Responses
Psychiatric crisis, stress
high intensity of client needs. Working with doctors who do not respect the work they do.
Safety concerns, lack of structured safety training, lack of adequate pay/benefits
Their own triggers in crisis interactions
pay, graduate college
Lack of boundaries, ethics and ability to maintain their own recovery
Jeopardy to their own recovery by heightened stress from the job
Progression into other roles; I've had several peers complete their CRSS certification and become crisis counselors.
Family/environmental factors which continue to impact their ability to maintain a consistent work schedule despite their own stability in their recovery.
Not being in a place in their own journey to help others. Old trauma wounds reopen and they are unable to continue with the work
struggles with boundaries and secondary trauma. lack of funds to engage in higher level self care. , traumatic experiences on the job.
Not prioritizing their own needs.
Burnout from stress, or even work stress such as feeling "judged" by co-workers
Pay, being re-triggered by clients, feeling misunderstood by their employer, issues with feeling they don't fit in with other staff who do not have lived experience as they do
Crisis situations that may trigger the them. Pay rate. Personal issues and not being able to set boundaries with people they serve.
very specific example thats come up many times: being in the jail doing crisis screens and how that experience brings up trauma from their own past arrests.
Difficulty with childcare / sickness / various appointments that come up sometimes short notice that the employee may have very limited support in family
Loss of recovery due to inadequate support
Pay
Successful achievement of CRSS certification
Their struggles with their own mental health is impacted directly by working in the crisis program
as situations arise they did not realize how the crisis situations would hit close to home and impact personal recovery
Their own mental health struggles already exist and these situations often trigger them
Rate of pay, balancing their own mental health issues
not feeling their utilized to their full potential
overscheduled to cover for lack of staffing
secondary trauma
stress
Triggering situations that elevate their anxiety.
burnout, compassion fatigue, not reaching out for support when it is needed
burnout, taking it really hard when client's relapse or have setbacks
stress, negative impact on mental/physical health
The stress, secondary trauma.
Struggling to maintain the balance between helping others in recovery and their own recovery.
Increased support, pay
low pay, insufficient supervision from leadership
not having continuous education
burnout and their own life crisises
Lack of compassion within the field and not knowing resources
People leave for increased opportunity for growth, better pay and feeling under utilized when on calls
Challenges in their own recovery journey
The mandate of completing the CRSS certification within one year of employment.
High demand of skills in short time of developmen
Lack of clarity on their role and responsibilities
Burnout and not having their own support systems to place. Pay is also a factor.
inability to maintain their recovery. challenges in career advancement.
The inability to grow within the agency. Made to feel less than by their peers.
Burnout/ limited ability for professional growth
Question 8
Question	What do you think would help decrease the rate at which Engagement Specialists leave the mobile crisis workforce?
Respondents	24
Responses
increase in pay and benefits.
Better support and consistent role delineation
better pay and more defined job description.
More opportunities to engage in and strengthen their own recovery during the workday.
Increased training opportunities specific to engagement to help them build their skills.
Major access to EAP services with unlimited sessions and highly trained clinicians, higher pay - WAY higher pay. increase in PTO and mh days.
more targeted conversations within weekly supervisions. Offering EAP within the agency more regularly.
Triggers and pressure in position. Some are not used to a professional/office type of position and find it difficult to adjust to boundaries and switching gears when crises come up.
Increased training and recovery support particularly to handling workplace stress. EAP related concerns
we've also discussed having "support groups" within the agency. For example, engagement specialists meeting with other engagement specialists without oversight of management
Improving trainings and increasing supervisions.
Increased recovery support for staff
trainings
Peer support groups for the Engagement Specialists to participate in to reduce burnout and improve confidence in their role
opportunities for strengthened structure of support. debrief opportunities and increased connectedness to peer groups
Training for supervisors on how to effectively supervise staff in recovery
Increased staffing to ensure reasonable workloads
Unique supervisor skills to manage this type of workforce nore effectively
stronger support
more training and growth opportunities
Feeling better utilized. Solidly understanding their role.
Specific supports designed for the Engagement Specialists, more pay, training for supervisors to work with staff, clear understanding of their role and being part of a team
I will second the professional setting, expectations, and interactions. That is a big one.
Higher pay
clear role. clear expectations.
More open communication about when engagement specialists may be struggling with an outreach or a particular client. Not letting it lead to burnout and negative impacts on their own mental health.
better pipeline to further careers
Support, advancement, and knowledge about supports
Have more opportunities for growth in the agencies without having to get a degree.
Professional development

## Sheet: Engagement Specialist Codes
Question 16					Question 16 Codebook					Question 17					Question 17 Codebook					Question 18					Question 18 Codebook					Question 19					Question 19 Codebook
ID	Response	Assigned Category	Subcodes		Code	High-Level Code	Label / Subcode	Description		ID	Response (Column A)	Assigned Category	Subcodes		Code	High-Level Code	Label / Subcode	Description		ID	Response (Q18)	Assigned Category	Subcodes		Code	Group	Label	Description		ID	Response (Q19)	Assigned Category	Subcodes		Code	Group	Label	Description
16C	Pay and incentives	Favorable View of Salary	CS1, CS2		CS1	Compensation & Salary	Good Pay / High Salary	References to pay, salary potential, or wage scale		16Z	higher pay	Compensation & Financial (CF)	CF1		CF1	Compensation & Financial	Salary / Pay	References to higher wages, salary adjustments, including increased on call stipends		16A	Shopping for greater salary	Pay / Compensation (P)	P1		WS1	Work Demands / Stress	Overwork / Excessive Workload	Mentions of being overworked, excessive workload		16AM	Higher salary	Pay / Compensation (P)	PC1		PC1	Pay / Compensation	Higher Pay	Mentions of increasing wages
16E	Good position... no masters required	Ease of Entry, Opportunity to Gain Experience	EE1, PG1		CS2	Compensation & Salary	Incentives / Benefits	References to financial perks beyond base pay (bonuses, stipends, etc.)		16AA	higher salary and better ability to staff without working multiple weekends/month on call	Compensation & Financial (CF), Scheduling & Workload (SW)	CF1, SW2, SW4		CF2	Compensation & Financial	Incentives	Sign-on bonuses, stipends, loan forgiveness for MHPs		16B	Multiple other openings that do not require on call or going into the community	Work Demands / Stress (WS)	WS5		WS2	Work Demands / Stress	Compassion Fatigue / Emotional Exhaustion	Mentions of direct burnout or emotional/compassion fatigue		Q19A	Free counseling/group support, increase access to resources, more money	Staff Support / Well-being (SW); Pay/Comp (PC)	SW1 (Mental Health Support), SC1, PC1 (Higher Pay)		PC2	Pay / Compensation	Better Benefits/EAP	Mentions of improving benefits or EAP, or adding financial incentives
16F	The appeal of working in a crisis capacity... it sounds exciting.	Nature of Work (exciting)	NW1		EE1	Education & Entry	Minimal / No Advanced Degree Required	Mentions ease of entry, low barriers		17A	$$$$$	Compensation & Financial (CF)	CF1		CF3	Compensation & Financial	Benefits	Health coverage, retirement, or other job benefits		16D	Pay, lack of support from community partners.	Pay / Compensation (P); Organizational / Policy (O)	P1; O1		WS3	Work Demands / Stress	On-Call or 24/7 Coverage	Mentions of on-call demands or 24/7 coverage		Q19B	Increase allowed PTO, more equitable pay, increased mindfulness around burnout/warning signs of burnout	Pay/Comp (PC); Work Structure/Scheduling (WS); Staff Support/Well-being (SW)	PC1, WS1 (More PTO), SW1 (burnout education)		PC3	Pay / Compensation	Higher Rates for Higher Degrees	For those who get a master's degree, increasing their reimbursement rate above what Medicaid provides via internal funds
16J	Short term relationships / immediate outcomes	Nature of work (immediate outcomes), short-term engagement	NW2		EE2	Education & Entry	Background Checks	Any mention of needing to pass / handle background checks		17B	Higher salary and more support from other agencies, such as DCFS	Compensation & Financial (CF), Support & Resources (SR)	CF1, SR3		CF4	Compensation & Financial	Education Funding	Tuition assistance, student debt relief, continuing education		16G	PAY that reflects training and expertise , outreach to colleges that crisis work in an option	Pay / Compensation (P); Response to Q.19 (R19)	P1; R19		WS4	Work Demands / Stress	Vicarious Trauma	Mentions of repeated exposure to traumatic events		Q19C	breaking the stigma with MCR needing support... they cannot show their needs.	Staff Support / Well-being (SW)	SW4 (Morale / Stigma Reduction)		SW1	Staff Support / Well-being	Mental Health Support	Counseling, EAP, therapy, self-care, burnout education
16K	motivation to do amazing, exciting work that saves lives	Nature of Work (impactful), (exciting)	NW1		NW1	Nature of Work	Exciting / Impactful	Describes crisis work as thrilling, meaningful, or life-saving		17C	Free counseling support for the crisis counselor	Support & Resources (SR)	SR1		SW1	Scheduling & Workload	Flexible Hours	Desire for scheduling flexibility		16H	Difficulty working with EMS and Police	Organizational / Policy (O)	O1		WS5	Work Demands / Stress	Undesirable Hours	Mentions of working weekends, overnights, or other unwanted scheduling		Q19D	increase PTO, increase pay, better EAP support. mh days!	Work Structure/Scheduling (WS); Pay/Comp (PC); Staff Support (SW)	WS1 (PTO), PC1 or PC2 (Better Pay or EAP?), SW1 (MH Support)		SW2	Staff Support / Well-being	Increase Staffing / Divide Work	Hiring more staff, smaller coverage, reducing workload
16M	Pay potential is high for that educational level	Favorable View of Pay	CS1		NW2	Nature of Work	Immediate Outcomes / Short-Term Engagement	Focus on short client relationships, quick results		17D	Better pay! Some crisis counselors make only slightly above minimum wage...	Compensation & Financial (CF)	CF1		SW2	Scheduling & Workload	On-Call / Weekend Issues	Mentions on-call burdens, weekend/holiday coverage		16I	pay and the unpredictability of the work	Pay / Compensation (P); Work Demands / Stress (WS)	P1; WS3		WS6	Work Demands / Stress	Work–Life Imbalance	Mentions of not leaving on time, no downtime, poor balance		Q19E	Money and increase support	Pay/Comp (PC); Staff Support/Well-being (SW)	PC1, SW1		SW3	Staff Support / Well-being	Supervision / Team Consultation / Team-building	More meetings, better supervision, collaborative support
16N	School & experience requirements	Ease of Entry	EE1		NW3	Nature of Work	Unpredictable / Unknown	States crisis is unknown, daily unpredictability		17E	More experience, better education regarding crisis, pay!!	Awareness / Reputation (AR)	AR1 (if you see “advertising crisis”)		SW3	Scheduling & Workload	Work–Life Balance	Work/life equilibrium, hand-off systems, stable shifts		16L	Having worked Crisis before and deciding it's not for them. Not wanting to work after-hours / weekends	Work Demands / Stress (WS)	WS5		P1	Pay / Compensation	Low Pay	Mentions of insufficient wages		Q19F	increased pay. having more staff so that the staff who are working can divide the work up more equitably	Pay/Comp (PC); Staff Support (SW)	PC1, SW2		SW4	Staff Support / Well-being	Morale / Stigma Reduction	Boosting morale, fighting stigma about needing help
16O	the unknown (crisis unpredictability)	Nature of Crisis Work (unpredictable)	NW3		NW4	Nature of Work	Community Engagement / Safety	Emphasis on working in the community, including safety concerns		17F	Money	Compensation & Financial (CF)	CF1		SW4	Scheduling & Workload	Staffing Levels	Need for more staff or splitting shifts		16S	Money, being on call, stress of the job	Pay / Compensation (P); Work Demands / Stress (WS)	P1; WS3, WS1		P2	Pay / Compensation	Few or No Raises	Mentions that raises or promotions rarely happen		Q19G	having time for more meetings for consultation / support / brainstorming / feeling a part of the team.	Staff Support / Well-being (SW)	SW3 (Team Consultation)		SW5	Staff Support / Well-being	Reduce Administrative Stress	Easing burdens or processes (overlaps with administrative changes)
16P	passion for crisis work... every day is different	Passion or Personal Connection..., unpredictable	NW1, NW3, MP1?		NW5	Nature of Work	Unique Work Environment	Work environment is a unique setting, it is collaborative work, etc		17G	Increase pay	Compensation & Financial (CF)	CF1		SW5	Scheduling & Workload	Insufficient Workload	Giving more work to avoid boredom		16T	Once they receive their higher license they move on to IT.	Career Growth / Advancement (C)	C2		P3	Pay / Compensation	Inadequate Benefits	Mentions poor or nonexistent health coverage, retirement, or other benefits		Q19H	Increase support for after hour shifts. \nIncreased pay.	Staff Support / Well-being (SW); Pay/Comp (PC)	SW2 (after hours support), PC1		SW6	Staff Support / Well-being	Increase Necessary Equipment	More vehicles
16Q	Not knowing the position exists yet. Since it is newer.	Position Awareness	A1		MP1	Motivation / Passion	Lived Experience / Personal Values	References to personal or professional values, lived experience		17H	higher salary	Compensation & Financial (CF)	CF1		SR1	Support & Resources	Mental Health Supports	EAP, free counseling, mental health days		16W	A huge factor that we have run into is state policy dictating specific hard stops to employment at mental health agencies. For instance someone having something come back on their DCFS background chec	Organizational / Policy (O)	O4		P4	Pay / Compensation	Funding Uncertainty	Grant-based funding is uncertain		Q19I	Pay, acknowledgement	Pay/Comp (PC); Staff Support / Well-being (SW)	PC1, SW4 (morale)		SW7	Staff Support / Well-being	Empowering staff to use lived experiences to motivate their work
16R	Pay, hours of work, benefits, desire to work in crisis	Favorable View of Pay, Favorable View of Work Hours, Benefits	CS1, CS2 (if “benefits”), MP2		MP2	Motivation / Passion	Helping Others	Emphasis on helping others or saving lives		17I	Reasonable shifts and expectations, increased pay	Scheduling & Workload (SW), Compensation & Financial (CF)	SW3? CF1		SR2	Support & Resources	Leadership / Morale	Being valued by leadership, self-care days, building morale		16X	Hours of work; stress of unpredictability	Work Demands / Stress (WS)	WS3, WS1		O1	Organizational / Policy	System Fragmentation	Mentions difficulty collaborating with EMS/Police or disconnected resources		Q19J	Ability to sustain larger stagging plans to reduce on call hours	Work Structure / Scheduling (WS)	WS3 (Revising on-call)		SW8	Staff Support / Well-being	Early Identification of Burnout/Struggles	Procedures to ensure staff who are struggling or fatigued are identified early
16U	work completed, pay rate, culture, support, supervision, collaboration	Nature of the Work, Fav. Pay, Culture, supportive environment?	CS1, NW5 (multiple)		PG1	Professional Growth / Experience	Gain Experience / Future Career	Mentions building resume, new career prospects, skillset development		17J	Flexible hours, more staff available, to split up the shifts	Scheduling & Workload (SW)	SW1, SW4		SR3	Support & Resources	Partnerships / External	Relationships with DCFS, police, other community partners		16Y	short-staffing leads to them being overworked and then some staff leave due to that	Work Demands / Stress (WS); Organizational / Policy (O)	WS1; O2		O2	Organizational / Policy	Lack of Training / Resources	Mentions insufficient training, minimal resources for staff		Q19K	Smaller region coverage	Staff Support / Well-being (SW)	SW2 (Increase Staffing / smaller region)		WS1	Work Structure / Scheduling	Increase PTO / Time Off	Any mention of more PTO or time away
16V	Excitement of helping others	Nature of the Work (exciting), Helping Others	NW1, MP2		A1	Awareness	Not Knowing crisis work exists	If you don't know the job exists, you can't obtain it		17K	Money. respect.	Compensation & Financial (CF), Awareness / Reputation (AR)	CF1, AR2		SR4	Support & Resources	Infrastructure	Additional crisis care (living rooms), resource expansions		16AG	Hours of work (24/7 nature of crisis)	Work Demands / Stress (WS)	WS3		O3	Organizational / Policy	Administrative Burdens	Mentions paperwork, oversight, or rigid policies		Q19L	Improved consistency in workload or the ability to utilize a larger team for support	Staff Support / Well-being (SW)	SW2		WS2	Work Structure / Scheduling	Flexible or Remote Options	Mentions of remote or telehealth expansion
16AB	lived experience	Passion or Personal Connection to Crisis Work	MP1							17L	more ways to enter... no 4 year degree?	Career Growth / Development (CG)	CG2		CG1	Career Growth / Development	Opportunities for Advancement	Promotion, upward mobility, leadership pathways, mentorship		16AH	Not a lot of people want to be on-call overnight and on weekends. Pay does not off-set the inconvenience. On call stipend is not high enough to be worth it if they do not get called out.	Work Demands / Stress (WS); Pay / Compensation (P)	WS3 or WS5; P1		O4	Organizational / Policy	Background Check / Hiring Barriers	Mentions hiring restrictions, DCFS checks		Q19M	higher pay; increased support through staff, equipment (ex: vehicles),	Pay/Comp (PC); Staff Support (SW)	PC1; SW6		WS3	Work Structure / Scheduling	Revising On-call / Undesirable Hours	Breaking up on-call, rotating weekend/overnight coverage
16AC	Unique experience	Nature of Work	NW1? or NW3?							17M	pay	Compensation & Financial (CF)	CF1		CG2	Career Growth / Development	Alternate Entry Pathways	Routes for those lacking a BA/BS		16AS	salary, work life balance, requirement of weekend, overnight, and holiday hours	Pay / Compensation (P); Work Demands / Stress (WS)	P1; WS5, WS6		C1	Career Growth / Advancement	No Upward Mobility	Mentions no chance for promotion or higher roles		Q19N	More bed availability for placements	Organizational Adjustments (OA)	SC1 (More client resources)
16AD	Pay scale	Favorable View of Pay	CS1							17N	Increased pay	Compensation & Financial (CF)	CF1		CG3	Career Growth / Development	Training/Skill Development	Learning new languages, supervision improvements		17Z	Burnout and general job stress.	Work Demands / Stress (WS)	WS2		C2	Career Growth / Advancement	Stepping Stone	Mentions seeing crisis role as temporary or a step to something else		Q19O	Decreased administrative burdens through redundant documentation	Organizational Adjustments (OA)	OA1 (Reduced Admin Burdens)		SC1	System Change	More Client Resources	Increasing availability of inpatient beds, shelters, etc.
16AE	Desire to work in Crisis (or not)	Nature of Work	MP1							17O	Pay	Compensation & Financial (CF)	CF1		AR1	Awareness / Reputation	Advertising Crisis Work	Messaging about the role, clarifying job duties		17AV	The role and duties did not align with their career goals/path, after all	Career Growth / Advancement (C)	C3		C3	Career Growth / Advancement	Not Aligned with Goals	Mentions personal career aims differ from crisis position		Q19P	Better bed availability for inpatient and for State Operated Facilities	System Change (SC)	SC1 (More client resources)		SC2	System Change	Partner Collaborations	Improving interactions with law enforcement, community resources
16AF	Pay and unpredictability, Lived experience, Immediate outcomes, Longer hours	Nature of Work, Compensation and Salary	NW2, NW3, MP1, CS1							17P	More stable hours & hand-off systems	Scheduling & Workload (SW)	SW3)		AR2	Awareness / Reputation	Respect for Role	Recognition as essential or emergency responders		17AW	Challenges with peers	Other Personal / Contextual (X)	X2		S1	Safety Concerns / Rural	Fear for Personal Safety	Mentions feeling unsafe or threatened while working in crisis		Q19Q	Doing a better job interviewing for high risk tolerance	Organizational Adjustments (OA)	OA2 (Better Hiring/Screening)		OA1	Organizational Adjustments	Reduced Admin Burdens	Mentions of cutting paperwork, removing bureaucracy
16AI	Low barrier to entry	Ease of Entry	EE1							17Q	Better work life balance	Scheduling & Workload (SW)	SW3		SF1	Stability / Funding Certainty	Stable Program Funds	Mentions about stability of grants or state-funded programs		17BD	Burn out and no enough money	Work Demands / Stress (WS); Pay / Compensation (P)	WS2; P1		S2	Safety Concerns / Rural	Minimal Backup in Rural Settings	Mentions rural environment with limited backup or EMS support		Q19R	More support, better debriefing, more PTO offered for time off	Staff Support (SW); Work Structure (WS)	SW3, WS1 (PTO)		OA2	Organizational Adjustments	Better Hiring/Screening/Training	Interviewing for risk tolerance, or ensuring good fit
16AJ	pay and incentives, exciting work, chance to gain experience, passion..., going in the community	Nature of the Work, Fav. Pay, Going into the community	Favorable Pay, NW1, PG1, MP1, NW4?							17R	pay	Compensation & Financial (CF)	CF1							17BE	When people have to be on call or available 24/7	Work Demands / Stress (WS)	WS3		X1	Other Factors	Family / Personal Life Conflicts	Mentions personal or family issues conflicting with job		Q19S	boosting morale within mental health; higher pay; full workforces	Staff Support (SW); Pay/Comp (PC)	SW4 (morale), PC1		OA3	Organizational Adjustments	Organizational Understanding of Policies and Procedures	Crisis teams are new, so even supervisors don't always know what to do
16AK	Gaining experience for additional career opportunities.	Opportunity to Gain Experience	PG1							17S	More action	Could be “Support & Resources” or “Scheduling & Workload?”	??? Possibly SR2							17BN	Poor training	Organizational / Policy (O)	O2		X2	Other Factors	Peer or Team Conflicts	Mentions interpersonal conflicts with co-workers or teammates		Q19T	Higher pay, more supports, better understanding of position requirements	Pay/Comp (PC); Staff Support (SW); Organizational Adjustments (OA)	PC1, SW1, OA2		CG1	Career Growth	Professional Development	Options for training, leadership routes, skill-building
16AL	Fear of responding in the community.	Opportunity to Gain Experience? (Might be negative)	NW4 (community context)							17T	support increase	Support & Resources (SR)	SR2 or SR3, depends on context							18A	burn out and feeling under appreciated	Work Demands / Stress (WS); Organizational / Policy (O)	WS2; O1 or O2		X3	Other Factors	Role misalignment	Temperment, personality, or other individual-level factors unrelated to stress/mental health that lead to poor role fit		Q19U	More training or options for self-care through the organization	Organizational Adjustments (OA); Staff Support / Well-being (SW)	OA2 (better training), SW1		CG2	Career Growth	Rotations or New Roles	Examples: Rotating between crisis teams, MCRT, less intense roles
16AN	Personal & professional Values (benefit community as a whole)	Nature of Work (impactful), Community Engagement	MP1, NW4							17U	Increase pay, more support	Compensation & Financial (CF), Support & Resources (SR)	CF1, SR2 (?)							18B	Agreed, burn out	Work Demands / Stress (WS)	WS2		R19	Response to Q.19	Proposed or Suggested Solution	Any explicit fix or recommendation to address problems		Q19V	Higher pay, and more resources for the homeless.	Pay/Comp (PC); System Change (SC)	PC1; SC1		X1	Other / Misc	Misc / Additional	Covers unique items not captured above
16AO	salary	Favorable View of Pay	CS1							17V	fully staffed teams	Scheduling & Workload (SW)	SW4							18C	being overworked and not compensated, compassion fatigue, lack of systemic change, lack of resources in community serving	Work Demands / Stress (WS); Pay / Compensation (P); Organizational / Policy (O)	WS1, WS2; P1; O1 or O2							Q19W	stronger training on self-care, vicarious trauma - how to truly implement the knowledge and skills	Staff Support / Well-being (SW)	SW1		X2	Other / Misc	Misc / Additional	Unclear response
16AP	Pay rate	Favorable View of Pay	CS1							17W	Increase in pay	Compensation & Financial (CF)	CF1							18D	administrative oversight	Organizational / Policy (O)	O3							Q19X	Reducing agency wait lists for therapy and case management would help to reduce reliance on crisis services.	System Change (SC)	SC1 (More resources for clients)
16AQ	Community safety	Desire to Keep Community Safe	NW4							17X	...they get to work from home.	Scheduling & Workload (SW)	SW1 or SW2							18E	Having to bounce back and forth between 1st, 2nd, and 3rd shifts.	Work Demands / Stress (WS)	WS5							Q19Y	Continuity or better systems for inpatient placement. Staff get seriously annoyed with repetitive bed search processes.	System Change (SC)	SC1
16AR	Higher salary	Favorable View of Pay	CS1							17Y	on-call and having to work lots of shifts	Scheduling & Workload (SW)	SW2							18F	Lack of pay, which creates external stressors limiting their ability to sustain work-related stress.	Pay / Compensation (P); Work Demands / Stress (WS)	P1; WS1 or WS2							Q19Z	Higher pay, better relationships with community partners	Pay/Comp (PC); System Change (SC)	PC1; SC2 (Partner Collaborations)
16AT	Salary	Favorable View of Pay	CS1							17AA	increased salary	Compensation & Financial (CF)	CF1							18G	Hours and On Call duties	Work Demands / Stress (WS)	WS3							Q19AA	More available staff, more partnerships with available resources, higher pay.	Staff Support (SW); System Change (SC); Pay/Comp (PC)	SW2, SC2, PC1
16AU	salary and work environment	Favorable View of Pay	CS1, maybe NW1?							17AB	Increased pay and/or other incentives or flexibilities	Compensation & Financial (CF), Scheduling & Workload (SW)	CF1, CF2, SW1							18H	The demand of the nature of the calls, then having to come back to complete the documentation.	Work Demands / Stress (WS); Organizational / Policy (O)	WS1 or WS2; O3							Q19AB	more resources available in the community -- shelters, food, jobs	System Change (SC)	SC1 (Client resources)
16AV	community safety	Desire to Keep Community Safe	NW4							17AC	increase pay, development support, hours	Compensation & Financial (CF), Support & Resources (?), Scheduling & Workload (?)	CF1, CG1							18I	Discomfort being alone in the community responding to difficult situations. Especially in rural areas where emergency support can be at a minimum 20 minutes away.	Safety Concerns / Rural (S)	S2							Q19AC	increased pay-	Pay/Comp (PC)	PC1
16AW	getting experience within the mental health system	Opportunity to Gain Experience	PG1							17AD	Increase pay.	Compensation & Financial (CF)	CF1							18J	stress	Work Demands / Stress (WS)	WS2							Q19AD	ability to engage in meaningful work	Other / Misc (X)	X2
16AX	Ability to pass background checks	Background Check Requirements	EE2							17AE	raising the on-call stipend... breaking weekend shifts...	Compensation & Financial (CF), Scheduling & Workload (SW)	CF1, SW2							18K	long hours	Work Demands / Stress (WS)	WS5 or WS1							Q19AE	Feeling empowered to utilize their life story and experiences to help others.	Staff Support / Well-being (SW)	SW4 or SW7
16AY	Gaining experience in mental health	Opportunity to Gain Experience	PG1							17AF	increased pay,	Compensation & Financial (CF)	CF1							18L	Hours of shifts and stress	Work Demands / Stress (WS)	WS1, WS5, WS2							Q19AF	100% remote work	Work Structure / Scheduling (WS)	WS2 (Remote/flexible)
16AZ	Personal interest in crisis intervention	Passion or Personal Connection	MP1							17AG	A well-established relationship w/ police..., bigger team so 24/7 is not intrusive	Support & Resources (SR), Scheduling & Workload (SW)	SR3, SW4							18M	unpredictability of the work day	Work Demands / Stress (WS)	WS3 or WS6							Q19AG	The ability to take time off more frequently	Work Structure / Scheduling (WS)	WS1 (More PTO)
16BA	Previous positive (or negative) experiences with crisis services	Passion or Personal Connection to Crisis Work	MP1							17AH	Identification and recognition as an emergency responder	Awareness / Reputation (AR)	AR2							18N	pay, many agencies dont pay for licensed level staff bc no rate change in revenue. burn out, on call shifts.	Pay / Compensation (P); Work Demands / Stress (WS)	P1; WS1, WS3							Q19AH	increased salary, more paid time off, rotating schedules for those burdened with overnight and weekend work, equitable share of holiday work, telehealth expansion	Pay/Comp (PC); Work Structure (WS)	PC1; WS1, WS2, WS3
16BA	**If you can handle a crisis... more valuable to an employer.**	Skills Gained / Future Resume Appeal	PG1							17AI	yes, a living room would help so much in our area.	Support & Resources (SR)	SR4							18O	Stress. Some may work another job already, and decide they don't need a \"side job\" with so much stress for not enough pay	Work Demands / Stress (WS); Pay / Compensation (P)	WS1 or WS2; P1							Q19AI	better resources for clients. \nincrease in pay \nbetter support systems	System Change (SC); Pay/Comp (PC); Staff Support (SW)	SC1, PC1, SW2 or SW1
										17AJ	Better work/life balance.	Scheduling & Workload (SW)	SW3							18P	Burnout.	Work Demands / Stress (WS)	WS2							Q19AJ	Having the possibility of having a proper possibility of professionale development within the agency they work at	Career Growth (CG)	CG1 (Professional dev)
										17AK	More money	Compensation & Financial (CF)	CF1							18Q	Long hours	Work Demands / Stress (WS)	WS5							Q19AK	Areas for growth within the work or rotations between like a fast pace crisis team (crisis stabilization) and a less fast pace crisis team (MCRT)	Career Growth (CG)	CG2 (Rotations)
										17AL	Better understanding of the work	Awareness / Reputation (AR)	AR1							18R	On-call hours in addition to shift work	Work Demands / Stress (WS)	WS3							Q19AL	remote/on call	Work Structure (WS)	WS2 (remote), WS3 (on-call changes)
										17AM	Being able to reduce their student debts...	Compensation & Financial (CF)	CF4							18S	Poor work life balance. Not always being able to leave on time. Not always a set 40 hour a week schedule	Work Demands / Stress (WS)	WS6							Q19AM	level of recovery and ability to manage the job. Many want to help but are unaware of how taxing the job can be.	Staff Support (SW), Organization Adjustments (OA)	SW1, OA22 (screening for resilience in hiring, or warning of demands)
										17AN	Increase pay and solid benefits	Compensation & Financial (CF)	CF1, CF3							18T	working multiple hours over designed shifts; travel distance/time; acuity is increasing leading to needing to know a lot about every diagnosis, symptom and type of client	Work Demands / Stress (WS); Organizational / Policy (O)	WS1; O2							Q19AO	Remote opportunities	Work Structure / Scheduling (WS)	WS2
										17AO	Pay and hours worked (effective scheduling )	Compensation & Financial (CF), Scheduling & Workload (SW)	CF1, SW1 or SW3							18U	Large geographical range	Safety Concerns / Rural (S)	S2							Q19AP	Opportunity for growth. Pay. Self-Care.	Career Growth (CG); Pay/Comp (PC); Staff Support (SW)	CG1, PC1, SW1
										17AP	money, room for growth and transformational leadership	Compensation & Financial (CF), Career Growth (CG), Support & Resources (SR)?	CF1, CG1, SR2?							18V	overworked; underpaid; unpredictable schedule	Work Demands / Stress (WS); Pay / Compensation (P)	WS1, WS3 or WS5; P1							Q19AQ	Better interactions with law enforcement and EMS/Fire, community support and employer support.	System Change (SC)	SC2 (Partner Collaborations)
										17AQ	Higher salary, more upward mobility..., share burden of overnight coverage	Compensation & Financial (CF), Career Growth (CG), Scheduling & Workload (SW)	CF1, CG1, SW2							18W	Stress, hours, pay, feeling connected to the team	Work Demands / Stress (WS); Pay / Compensation (P); Organizational / Policy (O)	WS1 or WS2, WS3, P1, O1 or O2							Q19AR	Pay increase, team building workshop/ retreat.	Pay/Comp (PC); Staff Support (SW)	PC1; SW3
										17AR	The possibility of having room for growth, learning other languages	Career Growth / Development (CG)	CG1, CG3							18X	Rate of pay, lack of upward mobility in position, stress from work	Pay / Compensation (P); Career Growth (C); Work Demands / Stress (WS)	P1; C1; WS1 or WS2							Q19AS	We need to be more flexible with their personal concerns.	Pay/Comp (PC); Work Structure / Scheduling (WS)	PC2 or WS2
										17AS	pay and better resources for client's.	Compensation & Financial (CF), Support & Resources (SR)	CF1, SR4							18Y	the stress level and emotional toll the job takes on you from vicarious trauma	Work Demands / Stress (WS)	WS2 or WS4							Q19AT	Stronger supervision	Staff Support (SW)	SW3 (Supervision)
										17AT	lack of flexibility with on call... demanding schedule	Scheduling & Workload (SW)	SW2							18Z	always moving organizational changes	Organizational / Policy (O)	O1 or O3							Q19AU	Increased pay and benefits	Pay / Compensation (PC)	PC1, PC2
										17AU	uncertainty about the permanency of state funded programs	Stability / Funding Certainty (SF)	SF1							18AA	Burnout, stress, and pay	Work Demands / Stress (WS); Pay / Compensation (P)	WS2; P1							Q19AV	Encouraging a work/life balance, pay increase	Work Structure (WS); Pay/Comp (PC)	WS6; PC1
										17AX	being valued by leadership... self-care days, incentives...	Support & Resources (SR)	SR2, CF2?							18AB	burnout; other positions with higher salary -> stepping stone	Work Demands / Stress (WS); Pay / Compensation (P); Career Growth (C)	WS2; P1; C2							Q19AW	Higher pay\nMore structure	Pay/Comp (PC); Staff Support (SW)	PC1; SW3
										17AY	Higher salaries	Compensation & Financial (CF)	CF1							18AC	Compassion Fatigue, burn out	Work Demands / Stress (WS)	WS2							Q19AX	Reducing work related stress	Staff Support (SW)	SW1 or SW2? or general?
										17AZ	Stability. Benefit package.	Stability / Funding Certainty (SF), Compensation & Financial (CF)	SF1, CF3							18AD	health concerns, high stress, high demand, irregular sleep	Work Demands / Stress (WS)	WS2 or WS1							Q19AY	Since crisis services are relatively new- even supervisors frequently are newbies themselves.	Organization Adjustments (OA)	OA3
										17BA	Better pay	Compensation & Financial (CF)	CF1							18AE	Find higher pay, better schedule in other roles	Pay / Compensation (P); Work Demands / Stress (WS)	P1; WS5							Q19AZ	Increase in pay and structured time of schedules and reducing admin burdens	Pay/Comp (PC); Work Structure (WS); Organizational Adjustments (OA)	PC1; WS3 or WS1; OA2
										17BB	Pay. More financial support for education & training...	Compensation & Financial (CF)	CF1, CF4							18AF	move out of on-call positions	Work Demands / Stress (WS)	WS3							Q19BA	More growth opportunities, increased supervision, further understanding of position requirements	Career Growth (CG); Staff Support (SW)	CG1; SW3 or SW2?
										17BC	The opportunity for advancement/professional development	Career Growth / Development (CG)	CG1							18AG	move on to higher paid positions	Pay / Compensation (P); Career Growth (C)	P1; C2							Q19BC	Increase compensation, more training relevant to job, support of supervisor, identifying burnout before it happens	Pay/Comp (PC); Staff Support (SW)	PC1; OA2, SW3, SW8
										17BF	Better communication of supervision & skill development	Support & Resources (SR), Career Growth (CG)?	SR2 or SR1, CG1							18AH	burnout, compassion fatigue, opportunity for more pay elsewhere	Work Demands / Stress (WS); Pay / Compensation (P)	WS2; P1							Q19BD	Creating a culture where managing burnout and vicarious trauma is supported and modeled.	Staff Support (SW)	SW4 (morale/stigma) or SW5 if about vicarious trauma training?
										17BG	Providing flexibility, providing quality supervision	Scheduling & Workload (SW), Support & Resources (SR)?	SW1 or SW3, SR2?							18AI	Burnout, feeling overworked, moving onto other positions with higher pay	Work Demands / Stress (WS); Pay / Compensation (P)	WS1 or WS2; P1							Q19BE	Supplemental pay for crisis counselors who get advanced degrees (e.g. Master's) to increase their pay rate relative to what it paid by Medicaid for all MHPs	Pay/Comp (PC)	PC3
										17BH	Increased pay and/or other incentives or flexibilities	Compensation & Financial (CF)	CF1, CF2							18AJ	get less demanding jobs that have similar pay	Work Demands / Stress (WS); Pay / Compensation (P)	WS1 or WS5; P1
										17BI	Increase pay, more support	Compensation & Financial (CF), Support & Resources (SR)	CF1, SR2 or SR3							18AK	Often crisis is seen as a stepping stone… higher paying or what they see as more prestigious roles.	Career Growth (C); Pay / Compensation (P)	C2; P1
										17BJ	Pay, schedule, and have more experience w/ crisis?	Compensation & Financial (CF), Scheduling & Workload (SW), Awareness / Reputation (AR)?	CF1, SW1, AR1							18AL	Needing more predictable schedule at and off work.	Work Demands / Stress (WS)	WS5 or WS6
										17BL	Reasonable shifts and expectations, increased pay	Scheduling & Workload (SW), Compensation & Financial (CF)	SW3, CF1							18AM	crisis workers get advanced degrees and move into clinical roles	Career Growth (C)	C2
										17BM	Due to grant funding, crisis counselor roles pay more...	Compensation & Financial (CF), Stability / Funding Certainty (SF)?	CF1, SF1?							18AN	24/7 schedule, working holidays, call offs and unexpected coverage is frequent.	Work Demands / Stress (WS)	WS3 or WS5
										17BO	hours and schedule, safety issues, compensation	Scheduling & Workload (SW), Compensation & Financial (CF), ???	SW2 or SW3, CF1, ???							18AO	Waiver process for background checks	Organizational / Policy (O)	O4
																				18AP	demanding hours	Work Demands / Stress (WS)	WS1 or WS5
																				18AQ	Rigid workplace policies	Organizational / Policy (O)	O3 or O1
																				18AR	\"lack of resources for clients. The feeling of knowing that you did everything you could for the client but also knowing that there is a gap in the system that doesn't meet clients needs fully\"	Organizational / Policy (O)	O1 or O2
																				18AS	burnout. find higher pay. better schedule in other roles	Work Demands / Stress (WS); Pay / Compensation (P)	WS2 or WS1; P1; WS5
																				18AT	Not a lot of room for professional development within the crisis services spectrum of services	Career Growth (C)	C1
																				18AU	They are consistently working with people on one of the worst days of their lives, and without higher pay some can't engage in self care needed to maintain resilience.	Work Demands / Stress (WS); Pay / Compensation (P)	WS2 or WS1; P1
																				18AV	Lack of financial support for crisis workers	Pay / Compensation (P)	P1
																				18AW	\"Demanding hours. something less stressful with more pay\"	Work Demands / Stress (WS); Pay / Compensation (P)	WS1 or WS5; P1
																				18AX	Ability to earn more money doing less stressful work	Pay / Compensation (P); Work Demands / Stress (WS)	P1; WS1 or WS2
																				18AY	overnight and weekend hours, salary and benefits, compassion fatigue, concern for personal safety…	Work Demands / Stress (WS); Pay / Compensation (P); Safety (S); Organizational/Policy (O)	WS5, P3, WS2, S1, O1?
																				18AZ	Gain the experience of being a part of the mobile crisis team as a Crisis Counselor and move on to administrative/supervisory positions.	Career Growth (C)	C2
																				18BA	Money	Pay / Compensation (P)	P1
																				18BB	Positive perspective of professional experience, the possibility of having continuous supervision and support in their professional route, increased wages	Pay / Compensation (P); Career Growth (C)	P1; C2 or C1
																				18BC	Financial Stress and cliental	Pay / Compensation (P)	P1
																				18BD	Pay. Stressful situations.	Pay / Compensation (P); Work Demands / Stress (WS)	P1; WS2 or WS1
																				18BE	Difficulty amongst peers	Other Personal / Contextual (X)	X2
																				18BF	Experience with burnout, and compensation.	Work Demands / Stress (WS); Pay / Compensation (P)	WS2 or WS1; P1
																				18BG	Unable to balance work life vs home life	Work Demands / Stress (WS)	WS6
																				18BH	Poor work life balance. Not always being able to leave on time. Not always a set 40 hour a week schedule	Work Demands / Stress (WS)	WS6
																				18BI	Constant change in programming	Organizational / Policy (O)	O1 or O3
																				18BJ	Pay and not feeling compensated fairly	Pay / Compensation (P)	P1
																				18BK	Compensation	Pay / Compensation (P)	P1
																				18BL	Being on call for a long period of time, changes in family/life	Work Demands / Stress (WS); Other Personal / Contextual (X)	WS3; X1
																				18BM	Too many shifts without enough down time. Insufficient emotional support from organization	Work Demands / Stress (WS); Organizational / Policy (O)	WS1 or WS2; O2
																				18BN	Lack of growth opportunities, lack of pay raises, hours of shift, wanting more predictability in their day	Career Growth (C); Pay / Compensation (P); Work Demands / Stress (WS)	C1; P2; WS3 or WS1
																				18BO	Getting clinical licensure and being able to go make more	Career Growth (C); Pay / Compensation (P)	C2; P1
																				18BP	Long hours, low morale, lack of support from management, lack of sufficient training	Work Demands / Stress (WS); Organizational / Policy (O)	WS5 or WS1/WS2; O2
																				18BQ	The work is heavy and they are often newer clinicians and struggle with time management and self care, also looking for more of where their professional goals align	Work Demands / Stress (WS); Career Growth (C); Organizational / Policy (O)	WS1 or WS2; C1; O2
																				18BR	lack of career growth opportunities	Career Growth (C)	C1
																				18BS	Vicarious trauma	Work Demands / Stress (WS)	WS4
																				Q19AN	Difficulties in task, time management and working in teams	Other Personal / Contextual (X)	X3
																				Q19BB	Unknown of future and grant	Other / Misc (X)	P4

## Sheet: Crisis Counselor Codes
Question 20					Question 20 Codebook					Question 21					Question 21 Codebook					Question 22					Question 22 Codebook					Question 23 Codebook				Question 23 Codebook
ID	Response	Codes	Q21/22/23?		Code	High-Level Code	Label	Description		ID	Response	Codes	Q20/22/23?		Code	High-Level Code	Subcode	Label / Description		ID	Response	Codes	Q20 or Q23?		Code	High-Level Category	Subcode	Description		ID	Response	Codes		Code	High-Level Category	Subcode	Description
Q20.1	During the interview process our agency has found it more difficult to find candidates far enough in their own recovery to be able to manage the high stress of Crisis response without burn out.	R1, ST1	-		R1	Recovery Status	Stage of Recovery	References to candidates being far along enough in their recovery to handle the stress of crisis work without burnout		Q21.1	Realistic salary and benefits	CB1, CB2			CB1	Compensation & Benefits	Salary	References to higher pay, competitive wages		Q22.1	Psychiatric crisis, stress	WB1, WB3	Q22		WB1	Workload & Burnout	High Stress / Intensity	References intense workload, high client acuity, or crisis stress		Q23.1	increase in pay and benefits.	C1, C2		C1	Compensation & Benefits	Higher Pay / PTO / MH Days	References increased salary, paid time off, mental health days
Q20.2	Lack of clarity on the job description.	K1	-		E1	Education & Entry	Minimal Entry Requirements	References to lacking a bachelor’s degree or other qualifications, pathways for those without formal education		Q21.2	Increased advertising around the goal of the peer support model and its efficacy thus far	AO1, AO2			CB2	Compensation & Benefits	Benefits	Including health coverage, retirement, general job benefits		Q22.2	high intensity of client needs. Working with doctors who do not respect the work they do.	WB1, SS2	Q22		WB2	Workload & Burnout	Secondary Trauma / Compassion Fatigue	Mentions trauma exposure, triggers, vicarious trauma		Q23.2	Better support and consistent role delineation	S1, W1		C2	Compensation & Benefits	Broader Benefits	EAP, advanced coverage, or other job benefits
Q20.3	- Agency standards on status of certification (CRSS), - Their own recovery status.	E1, R1	-		BC1	Background Check Requirements	Criminal or DCFS Checks	Mentions of requiring a CRSS/CPRS degree, or not requiring a bachelor's degree		Q21.3	Co-response with an officer to increase feeling of safety.	OT1; (Potentially new code for “Safety Partnerships,” not otherwise mapped)			CB3	Compensation & Benefits	Funding	Mentions increased funding to raise pay/benefits, or stable program funds		Q22.3	Safety concerns, lack of structured safety training, lack of adequate pay/benefits	WB1, PP1, OT1? (safety training)	Q22		WB3	Workload & Burnout	Burnout or Emotional Exhaustion	Direct mentions of burnout, emotional exhaustion		Q23.3	better pay and more defined job description.	C1, W1		W1	Work Structure & Role	Role Clarity / Defined Job	Mentions clearer responsibilities, better alignment
Q20.4	peer recruitment.	Response to Q.21	Response to Q.21		B1	Boundaries & Professionalism	Lack of Professional Boundaries	References to lacking boundaries, ethics, or readiness for a professional role		Q21.4	Providing more opportunities for peers to engage and strengthen their own recovery during the workday so that they can better support others.	SR1			AO1	Awareness & Outreach	Advertising / Recruitment	Promoting the peer support model, clarifying career track		Q22.4	Their own triggers in crisis interactions	RE2	Q22		WB4	Workload & Burnout	Overscheduling / Understaffing	Mentions staff shortage, covering extra shifts		Q23.4	More opportunities to engage in and strengthen their own recovery during the workday.	S1		W2	Work Structure & Role	Staffing / Workload	Improving staffing, ensuring manageable workloads
Q20.5	Recovery, Support, Benefits.	R1, P1	-		P1	Pay / Compensation	Low Pay	References to low wages, unlivable salaries, insufficient pay for qualifications		Q21.5	Waiver process for DCFS background checks.	BC1			AO2	Awareness & Outreach	Understanding Peer Role	Improving general awareness of peer professionals’ impact		Q22.5	pay, graduate college	PP1, PP3 (if "graduate college" implies leaving for bigger roles)	Q22		RE1	Recovery Challenges	Lack of Recovery Maintenance	References staff’s own recovery being jeopardized		Q23.5	Increased training opportunities specific to engagement to help them build their skills.	T1		T1	Training & Professional Dev	Staff Training / Skills	Specific training opportunities, skill building
Q20.6	the position isn't what they thought.	K1	-		P2	Pay / Compensation	Inability to Bill for Services	References to agencies not being able to bill for Engagement Specialist Services		Q21.6	more knowledge ahead of time of what the position is and how they can help others in their journeys	AO1, RC1			BC1	Background Checks	Waiver / Simplify	Mentions a simpler or faster waiver process for DCFS or criminal checks		Q22.6	Lack of boundaries, ethics and ability to maintain their own recovery	RS1, RE1	Q22		RE2	Recovery Challenges	Personal Triggers & Past Trauma	Mentions old wounds reopening, triggering personal issues		Q23.6	Major access to EAP services with unlimited sessions and highly trained clinicians, higher pay - WAY higher pay. increase in PTO and mh days.	C2, C1		T2	Training & Professional Dev	Supervisor Training / Skills	Training for supervisors on effectively leading ES staff
Q20.7	Similar to the first response - lack of people far enough along in their own recovery to be able to understand the boundaries/rules in place for transitioning to a professional role.	R1, B1	-		G1	Career Growth / Development	Growth Opportunities	References to promotional pathways, career trajectories, or upward mobility		Q21.7	Pay, respect for lived experience within the general public and professional world.	CB1, VG1			BC2	Background Checks	Faster Clearance	Shortening time from job offer to start date		Q22.7	Jeopardy to their own recovery by heightened stress from the job	RE1, WB1	Q22		RE3	Recovery Challenges	Family / Environmental Factors	Mentions childcare, family support, environment stress		Q23.7	more targeted conversations within weekly supervisions. Offering EAP within the agency more regularly.	S2, C2		T3	Training & Professional Dev	Career Growth / Advancement	Opportunities for professional development, pipeline to higher roles
Q20.8	peer recruitment.	Response to Q.21	Response to Q.21		K1	Knowledge / Awareness	Lack of Knowledge About the Role	Mentions of misunderstanding of job duties, lack of clarity in job descriptions		Q21.8	higher pay	CB1			TL1	Training & Leadership	Supervisor / Manager Training	Ensuring managers understand how to lead and support ES staff		Q22.8	Progression into other roles; I've had several peers complete their CRSS certification and become crisis counselors.	PP3 (other roles)	Q22		PP1	Pay & Progression	Low Pay / Insufficient Compensation	Mentions inadequate salary or benefits		Q23.8	Triggers and pressure in position. Some are not used to a professional/office type of position… adjust to boundaries…	(Arguably solution is training or role clarity. It's more an observation than a solution, but if they’re implying “need for training”? Possibly T1 or W1?). Or O1 if purely an observation.		S1	Support / Recovery Support	On-the-job Recovery Support	Providing or enhancing support groups, weekly supervisions, or structured peer support
Q20.9	Difficulty being able to be cleared through the required background checks. Based on events which may have occurred in their past.	BC1	-		S1	Personal Motivation / Mission	Helping Others / Giving Back	References to personal drive, lived experience, wanting to help others		Q21.9	Training our management staff on how to effectively lead staff who are in these roles.	TL1			TL2	Training & Leadership	CRSS / Peer Programs	Developing or expanding formal CRSS training pathways in colleges		Q22.9	Family/environmental factors which continue to impact their ability to maintain a consistent work schedule despite their own stability in their recovery.	RE3	Q22		PP2	Pay & Progression	Lack of Career Growth	References missing professional growth, feeling underutilized		Q23.9	Increased training and recovery support particularly to handling workplace stress. EAP related concerns	T1, S1, C2		S2	Support / Recovery Support	Supervision / Debriefing / Emotional Support	More debriefs, handling workplace stress, “connectedness to peer groups”
Q20.10	Level of recovery, lack of professionalism, lack of ethics and boundaries. Could be due to lack of training. Lack of billable services for the agency.	R1, B1, P2	-		ST1	Stress & Trauma	High Stress / Trauma Exposure	Mentions of high stress, secondary trauma, or difficulty managing the emotional burden of the role		Q21.10	A way to work through the background check process that shortens the time from job offer to job start. We've seen people find other jobs while waiting for backgrounds.	BC1, BC2			RC1	Role Clarity / Structure	Clearer Job Definition	Distinguishing ES tasks from other roles, clarifying responsibilities; removing CRSS/CPRS as an MHP credential to prevent role strain, and providing an alternative Medicaid billing code		Q22.10	Not being in a place in their own journey to help others. Old trauma wounds reopen and they are unable to continue with the work	RE1, RE2	Q22		PP3	Pay & Progression	Other Roles More Appealing	People leaving for better or advanced roles		Q23.10	we've also discussed having "support groups" within the agency… engagement specialists meeting with other engagement specialists without oversight of management	S1		O1	Other / Misc	Doesn’t Fit Elsewhere	Used if something truly doesn’t match the above
Q20.11	Pay is a factor as well. Agencies try to underpay peers based on their lack of higher education which creates unlivable wages.	P1	-		Sup1	Support & Supervision	Support / Recognition	References to emotional or structural support		Q21.11	Increased funding to improve pay / benefits	CB3, CB1, CB2			RC2	Role Clarity / Structure	More Structured Duties	E.g., ensuring the ES has set tasks beyond crisis response		Q22.11	struggles with boundaries and secondary trauma. lack of funds to engage in higher level self care. , traumatic experiences on the job.	RS1, WB2, PP1 (lack of funds for self care?), WB1?	Q22		PP4	Pay & Progression	Mandated CRSS or Additional Requirements	Concerns about mandatory CRSS certification timeline		Q23.11	Improving trainings and increasing supervisions.	T1, S2
Q20.12	Difficulty with background check process (past felonies or being on the healthcare registry ineligible to work).	BC1	-		RF1	Respect / Fulfillment	Desire for Respect / Recognition	Mentions of wanting recognition as a professional, feeling part of the team		Q21.12	More assistance or education pertaining to the background check waiver process.	BC1			SR1	Support & Recovery	In-Work Recovery Support	Providing ways for peers to strengthen their recovery on the job		Q22.12	Not prioritizing their own needs.	RE1	Q22		SS1	Support Systems & Culture	Lack of Supervision or Organizational Support	Mentions insufficient support from leadership, lacking resources		Q23.12	Increased recovery support for staff	S1
Q20.13	Pay rate. Opportunity for growth.	P1, G1	-		A1	Awareness / Recruitment	Lack of Awareness About the Role	References to people not knowing the role exists, or lack of outreach		Q21.13	Being able to do more in their position	RC2			SR2	Support & Recovery	Trauma / Emotional Support	Ensuring support for vicarious trauma or stress		Q22.13	Burnout from stress, or even work stress such as feeling "judged" by co-workers	WB3, SS2	Q22		SS2	Support Systems & Culture	Feeling Undervalued / Disrespected	References not being recognized, “judged” by co-workers		Q23.13	trainings	T1
Q20.14	The nature of the peer roles does not fit their career trajectory or preference.	G1	-		H1	Housing	Housing	Not having stable housing		Q21.14	More awareness that this career track exists	AO1			VG1	Valuing Lived Experience	Respect / Destigmatize	Recognizing peer backgrounds as an asset		Q22.14	Pay, being re-triggered by clients, feeling misunderstood by their employer, issues with feeling they don't fit in with other staff who do not have lived experience as they do	PP1, RE2, SS2	Q22		RS1	Role Clarity / Boundaries	Lack of Boundaries or Role Clarity	Mentions boundary issues, role confusion, or job mismatch		Q23.14	Peer support groups for the Engagement Specialists to participate in to reduce burnout and improve confidence in their role	S1
Q20.15	Background checks, opportunities for growth, pay.	BC1, G1, P1	-							Q21.15	More clear distinction on job roles in comparison to crisis workers	RC1			CG1	Career Growth	Advancement / Pipeline	Improving pathways for promotion or long-term career		Q22.15	Crisis situations that may trigger them. Pay rate. Personal issues and not being able to set boundaries with people they serve.	RE2, PP1, RS1	Q22		OT1	Other / Misc.	N/A	For lines that don’t fit other categories		Q23.15	opportunities for strengthened structure of support. debrief opportunities and increased connectedness to peer groups	S2, S1
Q20.16	Finding a balance between helping others and maintaining their recovery capital.	S1, R1	-							Q21.16	More global understanding of what peer support actually means and how it is discussed at all levels	AO2			OT1	Other / Miscellaneous	N/A	Used only if something doesn’t fit above		Q22.16	very specific example thats come up many times: being in the jail doing crisis screens and how that experience brings up trauma from their own past arrests.	RE2, WB2	Q22							Q23.16	Training for supervisors on how to effectively supervise staff in recovery	T2
Q20.17	Also finding an Engagement Specialist who is at a point in their recovery to be able to assist others without revisiting their past traumas.	R1, ST1	-							Q21.17	1) improvement in pay, 2) clarity of job role and aligning the strengths they have with client needs	CB1, RC1								Q22.17	Difficulty with childcare / sickness / various appointments that come up sometimes short notice that the employee may have very limited support in family	RE3	Q22							Q23.17	Increased staffing to ensure reasonable workloads	W2
Q20.18	Persons do not have a clear idea of the position, until the interview. Then with the proper information they determine it's not for them.	K1	-							Q21.18	Increased support for the vicarious trauma that they experience that may trigger them	SR2								Q22.18	Loss of recovery due to inadequate support	RE1, SS1	Q22							Q23.18	Unique supervisor skills to manage this type of workforce nore effectively	T2
Q20.19	Background check processes have placed barriers to hiring.	BC1	-							Q21.19	More support when dealing with trauma (their own and others), rate of pay, clear understanding of role	CB1, SR2, RC1								Q22.19	Pay	PP1	Q22							Q23.19	stronger support	S1 or S2 (non-specific but basically “support”)
Q20.20	Difficulties handling the stress of the position at different times.	ST1	-							Q21.20	stronger , advertisement and recruitment efforts	AO1								Q22.20	Successful achievement of CRSS certification	PP4? (maybe they move on after finishing CRSS?)	Q22							Q23.20	more training and growth opportunities	T1, T3
Q20.21	Wanting to help others achieve recovery.	S1	-							Q21.21	training of supervisors and staff working with engagement specialists. Encouraging engagement specialists to have their own peer support within the agency.	TL1, SR1								Q22.21	Their struggles with their own mental health is impacted directly by working in the crisis program	RE1	Q22							Q23.21	Feeling better utilized. Solidly understanding their role.	W1
Q20.22	Decreased mental health stigma.	S1	-							Q21.22	Background check waiver.	BC1								Q22.22	as situations arise they did not realize how the crisis situations would hit close to home and impact personal recovery	RE2, RE1	Q22							Q23.22	Specific supports designed for the Engagement Specialists, more pay, training for supervisors to work with staff, clear understanding of their role and being part of a team	C1, T2, W1, S1? (some aspects combined)
Q20.23	Ability to work in the field without Bachelors Degree.	E1	-							Q21.23	More awareness that this type of job is available. Many people still do not know that peer recovery is a profession.	AO1, AO2								Q22.23	Their own mental health struggles already exist and these situations often trigger them	RE2, RE1	Q22							Q23.23	I will second the professional setting, expectations, and interactions. That is a big one.	W1 (clear role, environment?), O1? Possibly role clarity.
Q20.24	not what they thought the position was.	Response to Q.22	Response to Q.22							Q21.24	increased pay, recognizing the importance of what they have to offer	CB1, VG1								Q22.24	Rate of pay, balancing their own mental health issues	PP1, RE1	Q22							Q23.24	Higher pay	C1
Q20.25	Distress tolerance and education vs pay.	ST1, E1, P1	-							Q21.25	destigmatize their lived experience	VG1								Q22.25	not feeling their utilized to their full potential	PP2 (lack of career growth)	Q22							Q23.25	clear role. clear expectations.	W1
Q20.26	Desire to meet the mission and be impactful in helping others from a peer perspective for those in vulnerable moments.	S1	-							Q21.26	Maybe more structure to the role when not responding to crises/making follow up calls/ looking up resources.	RC2								Q22.26	overscheduled to cover for lack of staffing	WB4	Q22							Q23.26	More open communication about when engagement specialists may be struggling… Not letting it lead to burnout…	S2 (debriefing / open conversation)
Q20.27	Ability to hire former clients who have gained recovery.	Response to Q.21	Response to Q.21							Q21.27	Simple way to waive background checks, particularly DCFS. we have had problems even with closed cases	BC1								Q22.27	secondary trauma	WB2	Q22							Q23.27	better pipeline to further careers	T3
Q20.28	Pay.	P1	-							Q21.28	background waivers, Comparable salary to Crisis Counselors	BC1, CB1								Q22.28	stress	WB1 or WB3 (if specifically "stress" => WB1 is general, or WB3 if we see it as burnout)	Q22							Q23.28	Support, advancement, and knowledge about supports	S1, T3
Q20.29	More outreach so they understand and are aware of jobs that are available to them.	Response to Q.21	Response to Q.21							Q21.29	Continued development of the CRSS programs at local colleges, ensuring adequate support for those in programs	TL2								Q22.29	Triggering situations that elevate their anxiety.	RE2, WB2	Q22							Q23.29	Have more opportunities for growth in the agencies without having to get a degree.	T3
Q20.30	Knowledge of the position.	K1	-							Q21.30	Insufficient guidance to teach ethics, foundational clinical skills, and support for continued recovery.	TL2, SR1? (lack of training + supporting peer recovery)								Q22.30	burnout, compassion fatigue, not reaching out for support when it is needed	WB3, WB2, SS1 (lack of support)	Q22							Q23.30	Professional development	T3
Q20.31	Desire to help others with similar experiences.	S1	-							Q21.31	Pay	CB1								Q22.31	burnout, taking it really hard when client's relapse or have setbacks	WB3, WB2	Q22
Q20.32	Their current struggles with mental health at times keep them from applying, as well as their lack of knowledge about the roles.	R1, K1	-							Q21.32	Knowing that they are able to assist those in need (validation).	VG1								Q22.32	stress, negative impact on mental/physical health	WB1, WB3 (since it’s “stress”), OT1? (health)	Q22
Q20.33	shared experience.	S1	-							Q21.34	Revise requirements fro the position	RC1								Q22.33	The stress, secondary trauma.	WB1, WB2	Q22
Q20.34	Opportunity to give back, instill hope. Be the hope they needed for someone else.	S1	-							Q21.35	Waving background check and more competitive pay.	BC1, CB1								Q22.34	Struggling to maintain the balance between helping others in recovery and their own recovery.	RE1	Q22
Q20.35	Ability to be hired without having any experience and getting to share their story to help others in recovery.	E1, S1	-							Q21.36	creating a better pipeline for advancements	CG1								Q22.35	Increased support, pay	SS1?, PP1?	**Potential solution** => Q23
Q20.36	pay, recognition as professionals, hesitation because of background checks.	P1, RF1, BC1	-																	Q22.36	low pay, insufficient supervision from leadership	PP1, SS1	**Potential solution** => Q23? (some mention solutions?)
Q20.37	Interest in using their lived experience to help others.	S1	-																	Q22.37	not having continuous education	PP4? (lack of formal training?), or could be TL2 in previous codebook… or OT1 here.	Q22
Q20.38	can see the positive impact their work makes.	S1	-																	Q22.38	burnout and their own life crisises	WB3, RE3?	Q22
Q20.39	They are an important part of the team.	RF1	-																	Q22.39	Lack of compassion within the field and not knowing resources	SS2 (lack of compassion?), or SS1? Possibly both.	Q22
Q20.40	recognition and respect and support.	RF1, Sup1	-																	Q22.40	People leave for increased opportunity for growth, better pay and feeling under utilized when on calls	PP3, PP1, PP2	Q22
Q20.41	More clarity around background check, DCFS check, and criminal history.	Response to Q.21	Response to Q.21																	Q22.41	Challenges in their own recovery journey	RE1 or RE2	Q22
Q20.42	lived experience.	R1	-																	Q22.42	The mandate of completing the CRSS certification within one year of employment.	PP4	Q22
Q20.43	Knowing engagement specialist positions even exist.	A1	-																	Q22.43	High demand of skills in short time of developmen	WB1? Possibly “lack of training” => OT1.	Q22
Q20.44	Knowledge of the services.	A1	-																	Q22.44	Lack of clarity on their role and responsibilities	RS1 (role clarity)	Q22
Q20.45	limited support, stage of recovery (how long in sustained recovery), and criminal background checks can be barriers.	Sup1, R1, BC1	-																	Q22.45	Burnout and not having their own support systems to place. Pay is also a factor.	WB3, SS1, PP1	Q22
Q20.46	Wanting to help others who have had similar life experiences.	S1	-																	Q22.46	inability to maintain their recovery. challenges in career advancement.	RE1, PP2	Q22
Q20.47	pay and lack of emotional support.	P1, Sup1	-																	Q22.47	The inability to grow within the agency. Made to feel less than by their peers.	PP2, SS2	Q22
Q20.48	Leave the Workforce: The difference in pay between a Peer Support Specialist and an Engagement Specialist.	Response to Q.22	Response to Q.22																	Q22.48	Burnout/ limited ability for professional growth	WB3, PP2	Q22
Q20.49	Sometimes, staff, be it Crisis Counselors or Engagement specialists, are terminated due to poor work performance; they are not just leaving, per se.	Response to Q.22	Response to Q.22
Q20.50	Lack of educational experience or lived experience.	E1, R1	-
Q20.51	Desire to help others who are experiencing what they have experienced.	S1	-
Q20.52	Their readiness. Lack of professional experience or experience being in a professional setting, setting proper boundaries. Limitations of the role.	R1, B1	-
Q20.53	Wanting to gain experience so they can pursue different roles in the field.	G1	-
Q20.54	Support from supervisor.	Response to Q.23	Response to Q.23
Q20.55	Having a stable place to stay. Life balance.	H1, ST1	-
Q20.56	Lived experience requirement.	R1	-
Q21.33	Advancements in the field may take a long time which can be discouraging.	Response to Q.20	Response to Q.20
