# Supplementary material
Source: Research Square preprint supplement (doi:10.21203/rs.3.rs-9417637/v1)
Supplement: Supplementary file 4 [file eea3b5e81b252cc4823343ed.docx]

Scheduling and workload management in mobile crisis systems present persistent and deeply felt challenges, with understaffing, undesirable hours, and burdensome on-call expectations frequently cited as major contributors to workforce attrition. While these conditions often undermine retention, many individuals are initially drawn to mobile crisis roles by the promise of flexible scheduling and adaptable work environments. If these features are implemented intentionally, they can serve as key solutions to improving sustainability and staff well-being.

One large, rural crisis team leader that participated in the GMB and the supplemental data collection later participated in a one-on-one follow-up interview. During this, she shared the innovative model that she developed with her team to maximize flexibility and decrease burnout. Administrative data demonstrates that this team has a very low turnover rate for both CCs and ESs. Under this “Committed Shift” model, all full-time employees work standard daytime shifts (e.g., 8a–5p or 9a–6p) and are required to commit to at least 24 hours of on-call coverage per month. The number of individuals required to work on-call may be increased during known surge periods (e.g., holidays, back-to-school) and reduced during slower months. These “committed shifts” are selected early in the year using an ordinal day-of-the-week framework and can vary by month. Shifts may be as short as one hour (e.g., John Doe commits to covering 9 PM – 10 PM on the first and third Mondays from January through October; see **Supplemental** **Table 5a**). Contracted staff may also pick up committed shifts once full-time staff have scheduled theirs. A filled-in calendar containing all the committed shifts and all the shifts that are yet to be taken is posted in a transparent, shared calendar each month. This allows for asynchronous sign-ups, trades, and releases. Importantly, committed shifts are fully swappable by design; employees may trade or give away any or all of their on-call responsibilities to willing colleagues without penalty. This built-in flexibility enables staff to adapt their workload to life circumstances—for example, one full-time employee reportedly went ten months without taking an on-call shift, having successfully arranged coverage through the shared scheduling system. On the other hand, all employees can pick up additional shifts to earn additional compensation, if there is shift availability. If any shifts are left unclaimed, members of the leadership team pick up these shifts and provide crisis care directly, reinforcing a team-based culture and shared accountability. Once the schedule is filled, it is reviewed for accuracy, with a goal of finalizing the schedule for the following month halfway through the current month. An example of the monthly scheduling process using the committed shifts from **Supplemental Table 5a** can be seen in **Supplemental** **Figure 5a**.

This model also builds real-time, burnout-conscious flexibility into operations, with team leaders monitoring staff morale and proactively working with staff to decrease their hours when they are feeling burnt-out. “Flex time” is honored when staff exceed scheduled hours, allowing staff to alter their schedules in real-time based on the amount they actually worked rather than the amount they were scheduled to work. Spontaneous use of paid time off is also culturally encouraged, with leadership urging employees to “call out happy” so long as they could find a substitute for their shift. For this organization, the interviewee noted it was only difficult around the holidays to find substitutes. Finally, a standing Emergency List of staff willing to respond to calls at any time at a particular location is maintained and updated regularly for use in urgent coverage scenarios, ensuring reliability even during unexpected surges.

Altogether, the Committed Shift Model reflects a scheduling approach grounded in flexibility, transparency, and intentional design to support workforce well-being while maintaining around-the-clock operations. The crisis team director who designed this approach notes that the model is time intensive and becomes more complex as organizations grow. Future work could explore ways to simplify the Committed Shift scheduling process.

**Table 5a: Committed Shift List**

**Monday – varies throughout year, see below**
**1st first two in Jan and first two in Dec**
P: Superman 5p-9p
P: Wonder Woman 9p-8a
B: Unassigned 5p-12a

**1st all but first 2 in Jan, all of Feb, March, April, May, Sept, Oct, Nov, all but first 2 of Dec.**
P: Batman 4p-9p
P: Wonder Woman 9p-8a
B: Unassigned 5p-12a

**1st June and July**
P: Batman 4p-12a
P: Unassigned 12a-8a
B: Unassigned 5p-12a

**1st August**
P: Batman 4p-9p
P: Unassigned 9p-8a
B: Unassigned 5p-12a

**2nd in Jan and Dec first 1 in Jan, first 2 in Dec**
P: Superman 5p-9p
P: Wonder Woman 9p-8a
B: Unassigned 5p-12a

**2nd all but first 2 in Jan, all of Feb, March, Sept, Oct, Nov, all but first 2 of Dec.**
P: Batman 4p-9p
P: Wonder Woman 9p-8a
B: Unassigned 5p-12a

**2nd: April, May**
P: Superman 5p-9p
P: Wonder Woman 9p-8a
B: Unassigned 5p-12a

**2nd June and July**
P: Batman 4p-12a
P: Unassigned 12a-8a
B: Unassigned 5p-12a

**2nd August**
P: The Flash 5p-9p
P: Unassigned 9p-8a
B: Unassigned 5p-12a

**3rd Jan, Feb, March, April, May, Sept, Oct, Nov, Dec.**
P: Batman 4p-9p
P: Wonder Woman 9p-8a
B: Unassigned 5p-12a

**3rd June and July**
P: Batman 4p-12a
P: Unassigned 12a-8a
B: Unassigned 5p-12a

**3rd August**
P: Batman 4p-9p
P: Unassigned 9p-8a
B: Unassigned 5p-12a

**4th Jan, Feb, March, April, May, Sept, Oct, Nov, Dec.**
P: The Flash 5p-9p
P: Wonder Woman 9p-8a
B: Unassigned 5p-12a

**4th June and July**
P: Batman 4p-12a
P: Unassigned 12a-8a
B: Unassigned 5p-12a

**4th August**
P: Aquaman 5p-9p
P: Wonder Woman 9p-8a
B: Unassigned 5p-12a

**5th Jan, Feb, March, April, May, Sept, Oct, Nov, Dec**
P: Batman 4p-9p
P: Wonder Woman 9p-8a
B: Unassigned 5p-12a

**5th June and July**
P: Batman 4p-12a
P: Unassigned 12a-8a
B: Unassigned 5p-12a

**5th August**
P: Batman 4p-9p
P: Unassigned 9p-8a
B: Unassigned 5p-12a

**Tuesday – varies throughout year, see below.**

**Jan, Feb, March, April, May, August, Sept, October, Nov, Dec (excluding June and July)**
**1st and 3rd**
P: Superman 5p-9p
P: Wonder Woman 9p-8a
B: Green Lantern 5p-12a

**2nd, 4th and 5th if applicable**
P: Batman 4p-9p
P: Wonder Woman 9p-8a
B: Green Lantern 5p-12a

**June and July**
P: Superman 5p-9p
P: Wonder Woman 9p-8a
B: Green Lantern 5p-12a

**Wednesday**
**1st year round**
P: Superman 5p-9p
P: Wonder Woman 9p-8a
B: Martian Manhunter 5p-12a

**2nd year round**
P: Superman 5p-9p
P: Wonder Woman 9p-9a
B: Martian Manhunter 5p-12a

**3rd year round**
P: Superman 5p-9p
P: Wonder Woman 9p-8a
B: Unassigned 5p-12a

**4th year round**
P: Superman 5p-9p
P: Wonder Woman 9p-9a
B: Unassigned 5p-12a

**5th year round**
P: Superman 5p-9p
P: Wonder Woman 9p-8a
B: Unassigned 5p-12a

**Thursday**
**1st and 3rd**
P: The Flash 5p-9p
P: Wonder Woman 9p-8a
B: Hawkgirl 5p-12a

**2nd**
P: The Flash 5p-9p
P: Wonder Woman 9p-9a
B: Hawkgirl 5p-12a

**4th**
P: Batman 4p-9p
P: Wonder Woman 9p-8a
B: Hawkgirl 5p-12a

**5th**
P: The Flash 5p-9p
P: Wonder Woman 9p-8a
B: Hawkgirl 5p-12a

**Friday**
**1st**
P: The Flash 5p-6p
P: Cyborg 6p-9a
B: Unassigned 5p-12a

**2nd April, May, September, October, November**
P: Green Lantern 5p-9a
B: Unassigned 5p-12a

**2nd Jan, Feb, March, June, July, Aug, & Dec**
P: Batman 4p-10p
P: Green Lantern 10p-9a
B: Unassigned 5p-12a

**3rd**
P: The Flash 5p-6p
P: Cyborg 6p-9a
B: Unassigned 5p-12a

**4th April, May, September, October, November**
P: Green Lantern 5p-9a
B: Unassigned 5p-12a

**4th Jan, Feb, March, June, July, Aug, & Dec**
P: Green Lantern 5p-9a
B: Unassigned 5p-12a

**5th**
P: Batman 4p-12a
P: Unassigned 12a-8a
B: Unassigned 5p-12a

**Saturday – no back up**
**1st**
P: Cyborg 9a-6p
P: Unassigned 6p-9a

**2nd – April, May, June, September, October, November**
P: Martian Manhunter 9a-5p
P: Green Lantern 5p-9a

**2nd – Jan, Feb, March, July, Aug, & Dec**
P: Martian Manhunter 9a-5p
P: Green Lantern 5p-9a

**3rd year round**
P: Cyborg 9a-6p
P: Unassigned 6p-9a

**4th April, May, September, October, November**
P: Unassigned 9a-5p
P: Green Lantern 5p-9a

**4th Feb, March, June, July, Aug, & Dec**
P: Unassigned 9a-5p
P: Green Lantern 5p-9a

**5th Saturday year round**
P: Unassigned 9a-9a

**Sunday**
**1st (all months except June and July)**
P: Batman 9a-5p
P: Unassigned 5p-12a
P: The Flash 12a-8a
B: Unassigned 5p-12a

**1st June and July**
P: Batman 9a-9p
P: Cyborg 9p-12a
P: The Flash 12a-8a
B: Unassigned 5p-12a

**2nd April, May, September, October, November**
P: Batman 9a-5p
P: Green Lantern 5p-12a
P: The Flash 12a-8a
B: Unassigned 5p-12a

**2nd Jan, Feb, March, June, July, Aug, & Dec**
P: Batman 9a-5p
P: Green Lantern 5p-12a
P: The Flash 12a-8a
B: Unassigned 5p-12a

**3rd (all months except June and July)**
P: Batman 9a-5p
P: Unassigned 5p-12a
P: The Flash 12a-8a
B: Unassigned 5p-12a

**3rd June and July**
P: Batman 9a-9p
P: Unassigned 9p-12a
P: The Flash 12a-8a
B: Unassigned 5p-12a

**4th April, May, September, October, November**
P: Batman 9a-5p
P: Green Lantern 5p-12a
P: The Flash 12a-8a
B: Unassigned 5p-12a

**4th Jan, Feb, March, June, July, Aug, & Dec**
P: Batman 9a-5p
P: Green Lantern 5p-12a
P: The Flash 12a-8a
B: Unassigned 5p-12a

**5th all months**
P: Batman 9a-8p
P: The Flash 8p-1a
P: Unassigned 1a-8a
B: Unassigned 5p-12a

| **Step 1: June 2025 After-Hours Schedule for Crisis Counselors (*Committed Shifts Only*)** | | | | | | |
| --- | --- | --- | --- | --- | --- | --- |
| **Sunday** | **Monday** | **Tuesday** | **Wednesday** | **Thursday** | **Friday** | **Saturday** |
| **1** Batman 9a-9p Cyborg 9p-12a The Flash 12a-8a B: Unassigned 5p-12a | **2** Batman 4p-12a Unassigned 12a-8a - B: Unassigned 5p-12a | **3** Superman 5p-9p Wonder Woman 9p-8a - B: Green Lantern 5p-12a | **4** Superman 5p-9p Wonder Woman 9p-8a - B: Martian Manhunter 5p-12a | **5** The Flash 5p-9p Wonder Woman 9p-8a - B: Hawkgirl 5p-12a | **6** The Flash 5p-6p Cyborg 6p-9a - B: Unassigned 5p-12a | **7** Cyborg 9a-6p Unassigned 6p-9a |
| **8** Batman 9a-5p Green Lantern 5p-12a The Flash 12a-8a B: Unassigned 5p-12a | **9** Batman 4p-12a Unassigned 12a-8a - B: Unassigned 5p-12a | **10** Superman 5p-9p Wonder Woman 9p-8a - B: Green Lantern 5p-12a | **11** Superman 5p-9p Wonder Woman 9p-9a - B: Martian Manhunter 5p-12a | **12** The Flash 5p-9p Wonder Woman 9p-9a - B: Hawkgirl 5p-12a | **13** Batman 4p-10p Green Lantern 10p-9a - B: Unassigned 5p-12a | **14** Martian Manhunter 9a-5p Green Lantern 5p-9a |
| **15** Batman 9a-9p Unassigned 9p-12a The Flash 12a-8a B: Unassigned 5p-12a | **16** Batman 4p-12a Unassigned 12a-8a - B: Unassigned 5p-12a | **17** Superman 5p-9p Wonder Woman 9p-8a - B: Green Lantern 5p-12a | **18** Superman 5p-9p Wonder Woman 9p-8a - B: Unassigned 5p-12a | **19** The Flash 5p-9p Wonder Woman 9p-8a - B: Hawkgirl 5p-12a | **20** The Flash 5p-6p Cyborg 6p-9a - B: Unassigned 5p-12a | **21** Cyborg 9a-6p Unassigned 6p-9a |
| **22** Batman 9a-5p Green Lantern 5p-12a The Flash 12a-8a B: Unassigned 5p-12a | **23** Batman 4p-12a Unassigned 12a-8a - B: Unassigned 5p-12a | **24** Superman 5p-9p Wonder Woman 9p-8a - B: Green Lantern 5p-12a | **25** Superman 5p-9p Wonder Woman 9p-9a - B: Unassigned 5p-12a | **26** Batman 4p-9p Wonder Woman 9p-8a - B: Hawkgirl 5p-12a | **27** Green Lantern 5p-9a  - B: Unassigned 5p-12a | **28** Unassigned 9a-5p Green Lantern 5p-9a |
| **29** Batman 9a-8p The Flash 8p-1a Unassigned 1a-8a B: Unassigned 5p-12a | **30** Batman 4p-12a Unassigned 12a-8a - B: Unassigned 5p-12a | Black = Committed Shift Red = Unassigned Shift | | | | |

**Supplemental Figure 5a: Committed Shift Calendar Steps**

| **Step 2: June 2025 After-Hours Schedule for Crisis Counselors (*In Progress*)** | | | | | | |
| --- | --- | --- | --- | --- | --- | --- |
| **Sunday** | **Monday** | **Tuesday** | **Wednesday** | **Thursday** | **Friday** | **Saturday** |
| **1** Batman 9a-9p Cyborg 9p-12a The Flash 12a-8a B: Catwoman 5p-12a | **2** Batman 4p-12a Unassigned 12a-8a - B: Robin 5p-12a | **3** Superman 5p-9p Wonder Woman 9p-8a - B: Green Lantern 5p-12a | **4** Superman 5p-9p Wonder Woman 9p-8a - B: Martian Manhunter 5p-12a | **5** The Flash 5p-9p Wonder Woman 9p-8a - B: Batman 5p-12a | **6** The Flash 5p-6p Cyborg 6p-9a - B: Robin 5p-12a | **7** Cyborg 9a-6p Catwoman 6p-9a |
| **8** Batman 9a-5p Green Lantern 5p-12a The Flash 12a-8a B: Wonder Woman 5p-12a | **9** Batman 4p-12a Superman 12a-8a - B: Catwoman 5p-12a | **10** Superman 5p-9p Wonder Woman 9p-8a - B: Green Lantern 5p-12a | **11** Superman 5p-9p Wonder Woman 9p-9a - B: Martian Manhunter 5p-12a | **12** The Flash 5p-9p Wonder Woman 9p-9a - B: Hawkgirl 5p-12a | **13** Batman 4p-10p Green Lantern 10p-9a - B: Robin 5p-12a | **14** Martian Manhunter 9a-5p Green Lantern 5p-9a |
| **15** Batman 9a-9p Unassigned 9p-12a The Flash 12a-8a B: Robin 5p-12a | **16** Batman 4p-12a Catwoman 12a-8a - B: Robin 5p-12a | **17** Superman 5p-9p Wonder Woman 9p-8a - B: Green Lantern 5p-12a | **18** Superman 5p-9p Wonder Woman 9p-8a - B: Green Lantern 5p-12a | **19** The Flash 5p-9p Wonder Woman 9p-8a - B: Batman 5p-12a | **20** The Flash 5p-6p Cyborg 6p-9a - B: John Constantine 5p-12a | **21** Cyborg 9a-6p Unassigned 6p-9a |
| **22** Batman 9a-5p Green Lantern 5p-12a The Flash 12a-8a B: Superman 5p-12a | **23** Batman 4p-12a Catwoman 12a-8a - B: Robin 5p-12a | **24** Superman 5p-9p Wonder Woman 9p-8a - B: Green Lantern 5p-12a | **25** Superman 5p-9p Wonder Woman 9p-9a - B: Unassigned 5p-12a | **26** Batman 4p-9p Wonder Woman 9p-8a - B: Hawkgirl 5p-12a | **27** Green Lantern 5p-9a - B: Unassigned 5p-12a | **28** Unassigned 9a-5p Green Lantern 5p-9a |
| **29** Batman 9a-8p The Flash 8p-1a Superman 1a-8a B: Catwoman 5p-12a | **30** Batman 4p-12a Catwoman 12a-8a - B: Robin 5p-12a | Black = Committed Shift Blue = Requested Swap, Not Yet Swapped Pink = Requested Swap, Successfully Swapped by Full Time or Contracted Staff Member Green = Filled Previously Unassigned Shift, Now Filled by Full Time Staff Member Orange = Filled Previously Unassigned Shift, Now Filled by Contracted Staff Member Red = Unassigned Shift | | | | |

| **Step 3: June 2025 After-Hours Schedule for Crisis Counselors (*Final Schedule*)** | | | | | | |
| --- | --- | --- | --- | --- | --- | --- |
| **Sunday** | **Monday** | **Tuesday** | **Wednesday** | **Thursday** | **Friday** | **Saturday** |
| **1** Batman 9a-9p Cyborg 9p-12a The Flash 12a-8a B: Catwoman 5p-12a | **2** Batman 4p-12a Unassigned 12a-8a - B: Robin 5p-12a | **3** Superman 5p-9p Wonder Woman 9p-8a - B: Green Lantern 5p-12a | **4** Superman 5p-9p Wonder Woman 9p-8a - B: Martian Manhunter 5p-12a | **5** The Flash 5p-9p Wonder Woman 9p-8a - B: Batman 5p-12a | **6** The Flash 5p-6p Cyborg 6p-9a - B: Robin 5p-12a | **7** Cyborg 9a-6p Catwoman 6p-9a |
| **8** Batman 9a-5p Green Lantern 5p-12a The Flash 12a-8a B: Wonder Woman 5p-12a | **9** Batman 4p-12a Superman 12a-8a - B: Catwoman 5p-12a | **10** Superman 5p-9p Wonder Woman 9p-8a - B: Green Lantern 5p-12a | **11** Superman 5p-9p Wonder Woman 9p-9a - B: Martian Manhunter 5p-12a | **12** The Flash 5p-9p Wonder Woman 9p-9a - B: Hawkgirl 5p-12a | **13** Batman 4p-10p Green Lantern 10p-9a - B: Robin 5p-12a | **14** Martian Manhunter 9a-5p Green Lantern 5p-9a |
| **15** Batman 9a-9p Unassigned 9p-12a The Flash 12a-8a B: Robin 5p-12a | **16** Batman 4p-12a Catwoman 12a-8a - B: Robin 5p-12a | **17** Superman 5p-9p Wonder Woman 9p-8a - B: Green Lantern 5p-12a | **18** Superman 5p-9p Wonder Woman 9p-8a - B: Green Lantern 5p-12a | **19** The Flash 5p-9p Wonder Woman 9p-8a - B: Batman 5p-12a | **20** The Flash 5p-6p Cyborg 6p-9a - B: John Constantine 5p-12a | **21** Cyborg 9a-6p Leadership 6p-9a |
| **22** Batman 9a-5p Green Lantern 5p-12a The Flash 12a-8a B: Superman 5p-12a | **23** Batman 4p-12a Catwoman 12a-8a - B: Robin 5p-12a | **24** Superman 5p-9p Wonder Woman 9p-8a - B: Green Lantern 5p-12a | **25** Superman 5p-9p Wonder Woman 9p-9a - B: Leadership 5p-12a | **26** Batman 4p-9p Wonder Woman 9p-8a - B: Robin 5p-12a | **27** Green Lantern 5p-9a - B: Leadership 5p-12a | **28** Leadership 9a-5p Green Lantern 5p-9a |
| **29** Batman 9a-8p The Flash 8p-1a Superman 1a-8a B: Catwoman 5p-12a | **30** Batman 4p-12a Catwoman 12a-8a - B: Robin 5p-12a | Black = Committed Shift Blue = Requested Swap, Unable to be Swapped Pink = Requested Swap, Successfully Swapped by Full Time or Contracted Staff Member Green = Filled Previously Unassigned Shift, Now Filled by Full Time Staff Member Orange = Filled Previously Unassigned Shift, Now Filled by Contracted Staff Member Purple = Leadership Picking Up Remaining Unassigned Shift | | | | |
